# Supplementary material for: Potential ecosystem service delivery by endemic plants in New Zealand vineyards: successes and prospects
Source: PeerJ. 2016 Jun 22;4:e2042. doi: 10.7717/peerj.2042 (PMC4924141; doi:10.7717/peerj.2042)
Supplement: Data S1 [file peerj-04-2042-s001.xlsx]

## Sheet: Table 1
	No raw data for this table; descriptive information only.

## Sheet: Cover data, Table 2
12 mth COVER here - and 6 mth below!!		Area at planting Oct 07		Growth in one year	Growth in one year
Block!	PlantSpecies!	(Total area cm including north and south side plants)	Area after one year	Growth(units of cm x cm)	Growth(units of m x m)
1	Disphyma australe	1280	0	-1280	-0.128
2	Disphyma australe	1102	0	-1102	-0.1102
3	Disphyma australe	750	0	-750	-0.075
4	Disphyma australe	1329	0	-1329	-0.1329
5	Disphyma australe	1197	0	-1197	-0.1197
6	Disphyma australe	1828	0	-1828	-0.1828
7	Disphyma australe	861	0	-861	-0.0861
8	Disphyma australe	2025	0	-2025	-0.2025
9	Disphyma australe	1594	0	-1594	-0.1594
10	Disphyma australe	1654	0	-1654	-0.1654
1	Leptinella squalida (club)	896	1857	961	0.0961
2	Leptinella squalida (club)	700	1580	880	0.088
3	Leptinella squalida (club)	625	3025	2400	0.24
4	Leptinella squalida (club)	930	5070	4140	0.414
5	Leptinella squalida (club)	961	5750	4789	0.4789
6	Leptinella squalida (club)	676	2330	1654	0.1654
7	Leptinella squalida (club)	796	3300	2504	0.2504
8	Leptinella squalida (club)	816	155	-661	-0.0661
9	Leptinella squalida (club)	681	2730	2049	0.2049
10	Leptinella squalida (club)	834	1865	1031	0.1031
1	Raoulia hookeri	468	2015	1547	0.1547
2	Raoulia hookeri	375	2335	1960	0.196
3	Raoulia hookeri	447	1650	1203	0.1203
4	Raoulia hookeri	372	2371	1999	0.1999
5	Raoulia hookeri	410	2370	1960	0.196
6	Raoulia hookeri	297	1946	1649	0.1649
7	Raoulia hookeri	536	1920	1384	0.1384
8	Raoulia hookeri	514	1485	971	0.0971
9	Raoulia hookeri	644	646	2	0.0002
10	Raoulia hookeri	515	1028	513	0.0513
1	Anaphaliodes bellioides	785	1796	1011	0.1011
2	Anaphaliodes bellioides	627	681	54	0.0054
3	Anaphaliodes bellioides	582	2821	2239	0.2239
4	Anaphaliodes bellioides	822	1512	690	0.069		Analysis of variance
5	Anaphaliodes bellioides	901	2484	1583	0.1583
6	Anaphaliodes bellioides	857	1290	433	0.0433		Variate: Growth_units_of_m_x_m (12 months)
7	Anaphaliodes bellioides	1108	425	-683	-0.0683
8	Anaphaliodes bellioides	572	405	-167	-0.0167		Source of variation	d.f.	s.s.	m.s.	v.r.	F pr.
9	Anaphaliodes bellioides	821	40	-781	-0.0781		Block	9	0.96395	0.10711	6.35	<.001
10	Anaphaliodes bellioides	1048	625	-423	-0.0423		PlantSpecies	13	2.44051	0.18773	11.13	<.001
1	Acaena inermis	483	4543	4060	0.406		Residual	117	1.97267	0.01686
2	Acaena inermis	332	0	-332	-0.0332		Total	139	5.37713
3	Acaena inermis	506	50	-456	-0.0456
4	Acaena inermis	415	5250	4835	0.4835
5	Acaena inermis	325	1890	1565	0.1565		Message: the following units have large residuals.
6	Acaena inermis	381	1575	1194	0.1194
7	Acaena inermis	500	600	100	0.01		*units* 41	0.314	s.e. 0.119
8	Acaena inermis	356	1	-355	-0.0355		*units* 57	-0.365	s.e. 0.119
9	Acaena inermis	503	2000	1497	0.1497		*units* 94	0.363	s.e. 0.119
10	Acaena inermis	604	280	-324	-0.0324		*units* 123	0.342	s.e. 0.119
1	Hebe chathamica	1422	2310	888	0.0888
2	Hebe chathamica	1583	4450	2867	0.2867
3	Hebe chathamica	1212	1920	708	0.0708		Tables of means
4	Hebe chathamica	3411	7620	4209	0.4209
5	Hebe chathamica	1686	6120	4434	0.4434		Variate: Growth_units_of_m_x_m
6	Hebe chathamica	1790	3038	1248	0.1248
7	Hebe chathamica	3046	225	-2821	-0.2821		Grand mean 0.133
8	Hebe chathamica	2796	3250	454	0.0454
9	Hebe chathamica	3272	3960	688	0.0688			Block	1	2	3	4	5	6	7
10	Hebe chathamica	1970	2965	995	0.0995				0.107	0.16	0.135	0.314	0.234	0.144	0.079
1	Muehlenbeckia ephedrioides	8	60	52	0.0052
2	Muehlenbeckia ephedrioides	0	50	50	0.005			Block	8	9	10							checkedDJS
3	Muehlenbeckia ephedrioides	4	0	-4	-0.0004				0.024	0.054	0.076							12 month growth
4	Muehlenbeckia ephedrioides	4	149	145	0.0145
5	Muehlenbeckia ephedrioides	0	2	2	0.0002			PlantSpecies	Disphyma australe	Leptinella squalida (club)							Leptinella dioica (leafy)	0.383
6	Muehlenbeckia ephedrioides	4	15	11	0.0011				-0.136	0.197							Acaena inermis purpurea	0.344
7	Muehlenbeckia ephedrioides	4	11	7	0.0007												Pratia angulata	0.224
8	Muehlenbeckia ephedrioides	4	11	7	0.0007			PlantSpecies	Raoulia hookeri	Anaphaliodes bellioides							Leptinella squalida (club)	0.197
9	Muehlenbeckia ephedrioides	4	5	1	0.0001				0.132	0.04							Geranium sessiliflorum	0.156
10	Muehlenbeckia ephedrioides	4	60	56	0.0056												Muehlenbeckia axillaris	0.154
1	Acaena inermis purpurea	540	2225	1685	0.1685			PlantSpecies	Acaena inermis	Hebe chathamica							Hebe chathamica	0.137
2	Acaena inermis purpurea	854	6400	5546	0.5546				0.118	0.137							Raoulia hookeri	0.132
3	Acaena inermis purpurea	830	3690	2860	0.286												Scleranthus uniflorus	0.131
4	Acaena inermis purpurea	1160	8550	7390	0.739			PlantSpecies	Muehlenbeckia ephedrioides	Acaena inermis purpurea							Acaena inermis	0.118
5	Acaena inermis purpurea	1171	7830	6659	0.6659				0.003	0.344							Anaphaliodes bellioides	0.04
6	Acaena inermis purpurea	1345	5075	3730	0.373												Muehlenbeckia ephedrioides	0.003
7	Acaena inermis purpurea	1048	4510	3462	0.3462			PlantSpecies	Scleranthus uniflorus	Leptinella dioica (leafy)							Raoulia subsericea	-0.025
8	Acaena inermis purpurea	1099	2046	947	0.0947				0.131	0.383							Disphyma australe	-0.136
9	Acaena inermis purpurea	1244	960	-284	-0.0284
10	Acaena inermis purpurea	720	3165	2445	0.2445			PlantSpecies	Pratia angulata	Raoulia subsericea							LSD(5%)	0.115
1	Scleranthus uniflorus	379	150	-229	-0.0229				0.224	-0.025
2	Scleranthus uniflorus	393	1980	1587	0.1587
3	Scleranthus uniflorus	507	1496	989	0.0989			PlantSpecies	Geranium sessiliflorum	Muehlenbeckia axillaris
4	Scleranthus uniflorus	676	3391	2715	0.2715				0.156	0.154
5	Scleranthus uniflorus	472	1231	759	0.0759
6	Scleranthus uniflorus	717	2380	1663	0.1663
7	Scleranthus uniflorus	511	2774	2263	0.2263		Least significant differences of means (5% level)
8	Scleranthus uniflorus	592	2669	2077	0.2077
9	Scleranthus uniflorus	501	935	434	0.0434		Table	Block	PlantSpecies
10	Scleranthus uniflorus	616	1410	794	0.0794		rep.	14	10
1	Leptinella dioica (leafy)	590	2460	1870	0.187		d.f.	117	117
2	Leptinella dioica (leafy)	1035	6840	5805	0.5805		l.s.d.	0.0972	0.115
3	Leptinella dioica (leafy)	840	3190	2350	0.235
4	Leptinella dioica (leafy)	1167	10442	9275	0.9275
5	Leptinella dioica (leafy)	1213	8100	6887	0.6887
6	Leptinella dioica (leafy)	1231	3015	1784	0.1784
7	Leptinella dioica (leafy)	820	4374	3554	0.3554
8	Leptinella dioica (leafy)	1392	3360	1968	0.1968
9	Leptinella dioica (leafy)	1464	2592	1128	0.1128
10	Leptinella dioica (leafy)	962	4670	3708	0.3708
1	Pratia angulata	965	2080	1115	0.1115
2	Pratia angulata	591	2620	2029	0.2029
3	Pratia angulata	2116	2450	334	0.0334
4	Pratia angulata	1127	5450	4323	0.4323
5	Pratia angulata	1001	3305	2304	0.2304
6	Pratia angulata	1445	6050	4605	0.4605
7	Pratia angulata	857	2880	2023	0.2023
8	Pratia angulata	1171	2700	1529	0.1529
9	Pratia angulata	994	3650	2656	0.2656
10	Pratia angulata	1224	2700	1476	0.1476
1	Raoulia subsericea	321	240	-81	-0.0081
2	Raoulia subsericea	336	26	-310	-0.031
3	Raoulia subsericea	280	0	-280	-0.028
4	Raoulia subsericea	444	510	66	0.0066
5	Raoulia subsericea	396	82	-314	-0.0314
6	Raoulia subsericea	485	0	-485	-0.0485
7	Raoulia subsericea	450	60	-390	-0.039
8	Raoulia subsericea	355	100	-255	-0.0255
9	Raoulia subsericea	488	0	-488	-0.0488
10	Raoulia subsericea	410	425	15	0.0015
1	Geranium sessiliflorum	1108	1700	592	0.0592
2	Geranium sessiliflorum	664	1260	596	0.0596
3	Geranium sessiliflorum	426	5425	4999	0.4999
4	Geranium sessiliflorum	560	2400	1840	0.184
5	Geranium sessiliflorum	920	3300	2380	0.238
6	Geranium sessiliflorum	561	2764	2203	0.2203
7	Geranium sessiliflorum	669	2020	1351	0.1351
8	Geranium sessiliflorum	632	795	163	0.0163
9	Geranium sessiliflorum	565	1396	831	0.0831
10	Geranium sessiliflorum	565	1186	621	0.0621
1	Muehlenbeckia axillaris	881	3655	2774	0.2774
2	Muehlenbeckia axillaris	811	3600	2789	0.2789
3	Muehlenbeckia axillaris	1091	3400	2309	0.2309
4	Muehlenbeckia axillaris	814	4530	3716	0.3716
5	Muehlenbeckia axillaris	996	1905	909	0.0909
6	Muehlenbeckia axillaris	1461	3725	2264	0.2264
7	Muehlenbeckia axillaris	1696	891	-805	-0.0805
8	Muehlenbeckia axillaris	1631	370	-1261	-0.1261
9	Muehlenbeckia axillaris	886	2285	1399	0.1399
10	Muehlenbeckia axillaris	803	2150	1347	0.1347
6 month growth
Block!	Treatment!	6MthGrowthcmxcm	6MthGrowthmxm		Analysis of variance	Growth in Cover to 6 months
1	Disphyma australe	2770	0.277
2	Disphyma australe	6323	0.6323		Variate: %6MthGrowthmxm
3	Disphyma australe	5486	0.5486
4	Disphyma australe	3357	0.3357		Source of variation	d.f.	s.s.	m.s.	v.r.	F pr.
5	Disphyma australe	6037	0.6037		Block	9	0.1929	0.02143	1.64	0.111
6	Disphyma australe	9452	0.9452		Treatment	13	2.12452	0.16342	12.52	<.001
7	Disphyma australe	4314	0.4314		Residual	117	1.52698	0.01305
8	Disphyma australe	2343	0.2343		Total	139	3.8444
9	Disphyma australe	581	0.0581
10	Disphyma australe	3792	0.3792
1	Leptinella squalida (club)	524	0.0524		Message: the following units have large residuals.
2	Leptinella squalida (club)	308	0.0308
3	Leptinella squalida (club)	1375	0.1375		*units* 6	0.505	s.e. 0.1044
4	Leptinella squalida (club)	3290	0.329		*units* 9	-0.325	s.e. 0.1044
5	Leptinella squalida (club)	-839	-0.0839
6	Leptinella squalida (club)	926	0.0926
7	Leptinella squalida (club)	1359	0.1359		Tables of means
8	Leptinella squalida (club)	113	0.0113
9	Leptinella squalida (club)	955	0.0955		Variate: %6MthGrowthmxm
10	Leptinella squalida (club)	1616	0.1616
1	Raoulia hookeri	1811	0.1811		Grand mean 0.1546
2	Raoulia hookeri	1839	0.1839
3	Raoulia hookeri	2003	0.2003			Block	1	2	3	4	5	6	7
4	Raoulia hookeri	1008	0.1008				0.1601	0.2124	0.1707	0.2029	0.1846	0.1503	0.1333
5	Raoulia hookeri	1590	0.159
6	Raoulia hookeri	1138	0.1138			Block	8	9	10
7	Raoulia hookeri	1186	0.1186				0.1107	0.0932	0.1274
8	Raoulia hookeri	1277	0.1277
9	Raoulia hookeri	605	0.0605			Treatment	Disphyma australe	Leptinella squalida (club)
10	Raoulia hookeri	811	0.0811				0.4446	0.0963
1	Anaphaliodes bellioides	1795	0.1795
2	Anaphaliodes bellioides	133	0.0133			Treatment	Raoulia hookeri	Anaphaliodes bellioides
3	Anaphaliodes bellioides	2402	0.2402				0.1327	0.0586
4	Anaphaliodes bellioides	1753	0.1753
5	Anaphaliodes bellioides	-481	-0.0481			Treatment	Acaena inermis	Hebe chathamica
6	Anaphaliodes bellioides	298	0.0298				0.0703	0.1882
7	Anaphaliodes bellioides	-406	-0.0406
8	Anaphaliodes bellioides	603	0.0603			Treatment	Muehlenbeckia ephedrioides	Acaena inermis purpurea
9	Anaphaliodes bellioides	-341	-0.0341				0.0309	0.2782
10	Anaphaliodes bellioides	102	0.0102
1	Acaena inermis	3207	0.3207			Treatment	Scleranthus uniflorus	Leptinella dioica (leafy)
2	Acaena inermis	-326	-0.0326				0.0566	0.2425
3	Acaena inermis	-6	-0.0006
4	Acaena inermis	1825	0.1825			Treatment	Pratia angulata	Raoulia subsericea
5	Acaena inermis	699	0.0699				0.296	-0.0309
6	Acaena inermis	79	0.0079
7	Acaena inermis	268	0.0268			Treatment	Geranium sessiliflorum	Muehlenbeckia axillaris
8	Acaena inermis	-350	-0.035				0.1015	0.1985
9	Acaena inermis	1088	0.1088
10	Acaena inermis	546	0.0546
1	Hebe chathamica	1713	0.1713		Least significant differences of means (5% level)
2	Hebe chathamica	4167	0.4167
3	Hebe chathamica	1488	0.1488		Table	Block	Treatment
4	Hebe chathamica	2664	0.2664		rep.	14	10
5	Hebe chathamica	3239	0.3239		d.f.	117	117
6	Hebe chathamica	460	0.046		l.s.d.	0.08551	0.10118
7	Hebe chathamica	554	0.0554
8	Hebe chathamica	2188	0.2188
9	Hebe chathamica	898	0.0898
10	Hebe chathamica	1450	0.145
1	Muehlenbeckia ephedrioides	917	0.0917
2	Muehlenbeckia ephedrioides	1900	0.19
3	Muehlenbeckia ephedrioides	0	0
4	Muehlenbeckia ephedrioides	-3	-0.0003
5	Muehlenbeckia ephedrioides	1	0.0001
6	Muehlenbeckia ephedrioides	-2	-0.0002
7	Muehlenbeckia ephedrioides	-3	-0.0003
8	Muehlenbeckia ephedrioides	-1	-0.0001
9	Muehlenbeckia ephedrioides	286	0.0286
10	Muehlenbeckia ephedrioides	-4	-0.0004
1	Acaena inermis purpurea	1260	0.126
2	Acaena inermis purpurea	5166	0.5166
3	Acaena inermis purpurea	2594	0.2594
4	Acaena inermis purpurea	4025	0.4025
5	Acaena inermis purpurea	3029	0.3029
6	Acaena inermis purpurea	1442	0.1442
7	Acaena inermis purpurea	4832	0.4832
8	Acaena inermis purpurea	911	0.0911
9	Acaena inermis purpurea	2661	0.2661
10	Acaena inermis purpurea	1900	0.19
1	Scleranthus uniflorus	-283	-0.0283
2	Scleranthus uniflorus	527	0.0527
3	Scleranthus uniflorus	201	0.0201
4	Scleranthus uniflorus	1024	0.1024
5	Scleranthus uniflorus	562	0.0562
6	Scleranthus uniflorus	883	0.0883
7	Scleranthus uniflorus	796	0.0796
8	Scleranthus uniflorus	370	0.037
9	Scleranthus uniflorus	638	0.0638
10	Scleranthus uniflorus	941	0.0941
1	Leptinella dioica (leafy)	3235	0.3235
2	Leptinella dioica (leafy)	3365	0.3365
3	Leptinella dioica (leafy)	1816	0.1816
4	Leptinella dioica (leafy)	2913	0.2913
5	Leptinella dioica (leafy)	4121	0.4121
6	Leptinella dioica (leafy)	710	0.071
7	Leptinella dioica (leafy)	3537	0.3537
8	Leptinella dioica (leafy)	2558	0.2558
9	Leptinella dioica (leafy)	-142	-0.0142
10	Leptinella dioica (leafy)	2138	0.2138
1	Pratia angulata	1275	0.1275
2	Pratia angulata	2474	0.2474
3	Pratia angulata	1990	0.199
4	Pratia angulata	3773	0.3773
5	Pratia angulata	4804	0.4804
6	Pratia angulata	2932	0.2932
7	Pratia angulata	2743	0.2743
8	Pratia angulata	4413	0.4413
9	Pratia angulata	3314	0.3314
10	Pratia angulata	1881	0.1881
1	Raoulia subsericea	-141	-0.0141
2	Raoulia subsericea	-284	-0.0284
3	Raoulia subsericea	-280	-0.028
4	Raoulia subsericea	-329	-0.0329
5	Raoulia subsericea	-396	-0.0396
6	Raoulia subsericea	-484	-0.0484
7	Raoulia subsericea	-274	-0.0274
8	Raoulia subsericea	-255	-0.0255
9	Raoulia subsericea	-488	-0.0488
10	Raoulia subsericea	-155	-0.0155
1	Geranium sessiliflorum	1014	0.1014
2	Geranium sessiliflorum	756	0.0756
3	Geranium sessiliflorum	2213	0.2213
4	Geranium sessiliflorum	805	0.0805
5	Geranium sessiliflorum	2350	0.235
6	Geranium sessiliflorum	1263	0.1263
7	Geranium sessiliflorum	195	0.0195
8	Geranium sessiliflorum	412	0.0412
9	Geranium sessiliflorum	345	0.0345
10	Geranium sessiliflorum	796	0.0796
1	Muehlenbeckia axillaris	3319	0.3319
2	Muehlenbeckia axillaris	3389	0.3389
3	Muehlenbeckia axillaris	2619	0.2619
4	Muehlenbeckia axillaris	2300	0.23
5	Muehlenbeckia axillaris	1134	0.1134
6	Muehlenbeckia axillaris	1939	0.1939
7	Muehlenbeckia axillaris	-436	-0.0436
8	Muehlenbeckia axillaris	919	0.0919
9	Muehlenbeckia axillaris	2642	0.2642
10	Muehlenbeckia axillaris	2022	0.2022

## Sheet: Survival data, Table 2
				Survival after year one									Survival at 2 years (Nov 09)							without disphyma	Survival at 2 years (Nov 09)
				(out of 20 plants (north and south side of vine) so two plants of spp in each block)									Present or not in block- so max is 10.							Block!	Treatment!	Response		35 "General Model."
		area south	area north					%												1	Leptinella squalida (club)	1		36 MODEL [DISTRIBUTION=bernoulli; LINK=logit; DISPERSION=1] Response
Block	Plant species	0	0	0				Survival at 12 months	Survival at 24 months				Block	Plant species	Present = 1	% survive	condition			2	Leptinella squalida (club)	0		37 FITINDIVIDUALLY [PRINT=model,summary,estimates,accumulated; CONSTANT=estimate; FPROB=yes;\
1	Disphyma australe	0	0	0			M. axillaris	100	100				1	Disphyma australe	0					3	Leptinella squalida (club)	1		38 TPROB=yes; FACT=9] Treatment
2	Disphyma australe	0	0	0			L. dioica	100	100				2	Disphyma australe	0					4	Leptinella squalida (club)	0		_x000C_Regression analysis
3	Disphyma australe	0	0	0			R. hookeri	100	100				3	Disphyma australe	0					5	Leptinella squalida (club)	0
4	Disphyma australe	0	0	0			A.inermis purpurea	100	90				4	Disphyma australe	0					6	Leptinella squalida (club)	0			Response variate:	Response
5	Disphyma australe	0	0	0			G. sessiliflorum	100	90				5	Disphyma australe	0					7	Leptinella squalida (club)	1			Distribution:	Bernoulli
6	Disphyma australe	0	0	0			S. uniflorus	100	80				6	Disphyma australe	0					8	Leptinella squalida (club)	0			Link function:	Logit
7	Disphyma australe	0	0	0			H. chathamica	100	80				7	Disphyma australe	0					9	Leptinella squalida (club)	1			Fitted terms:	Constant, Treatment
8	Disphyma australe	0	0	0			L. angulata	100	70				8	Disphyma australe	0					10	Leptinella squalida (club)	1
9	Disphyma australe	0	0	0			L. squalida	95	50				9	Disphyma australe	0					1	Raoulia hookeri	1
10	Disphyma australe	0	0	0	0		A. bellioides	90	40				10	Disphyma australe	0	0				2	Raoulia hookeri	1		Summary of analysis
1	Leptinella squalida (club)	1742	115	2			M. ephedrioides	80	0				1	Leptinella squalida (club)	1		P			3	Raoulia hookeri	1
2	Leptinella squalida (club)	1280	300	2			A. inermis	60	60				2	Leptinella squalida (club)	0					4	Raoulia hookeri	1					mean	deviance	approx
3	Leptinella squalida (club)	1000	2025	2			R. subsericea	60	10				3	Leptinella squalida (club)	1		G			5	Raoulia hookeri	1		Source	d.f.	deviance	deviance	ratio	chi pr
4	Leptinella squalida (club)	2600	2470	2			D. australe	0	0				4	Leptinella squalida (club)	0					6	Raoulia hookeri	1		Regression	12	72.5	6.042	6.04	<.001
5	Leptinella squalida (club)	5750	0	1									5	Leptinella squalida (club)	0					7	Raoulia hookeri	1		Residual	117	92.52	0.7908
6	Leptinella squalida (club)	1595	735	2									6	Leptinella squalida (club)	0					8	Raoulia hookeri	1		Total	129	165.03	1.2793
7	Leptinella squalida (club)	1500	1800	2									7	Leptinella squalida (club)	1		G			9	Raoulia hookeri	1		Change	-12	-72.5	6.042	6.04	<.001
8	Leptinella squalida (club)	150	5	2									8	Leptinella squalida (club)	0					10	Raoulia hookeri	1
9	Leptinella squalida (club)	1680	1050	2									9	Leptinella squalida (club)	1		G			1	Anaphaliodes bellioides	1		Dispersion parameter is fixed at 1.00.
10	Leptinella squalida (club)	1820	45	2	95								10	Leptinella squalida (club)	1	50	G			2	Anaphaliodes bellioides	1
1	Raoulia hookeri	1250	765	2									1	Raoulia hookeri	1		G			3	Anaphaliodes bellioides	0		Message: deviance ratios are based on dispersion parameter with value 1.
2	Raoulia hookeri	1260	1075	2									2	Raoulia hookeri	1		G			4	Anaphaliodes bellioides	0
3	Raoulia hookeri	1250	400	2									3	Raoulia hookeri	1		G			5	Anaphaliodes bellioides	0		Message: the residuals do not appear to be random; for example, fitted values in the range 0.90 to 1.00 are consistently smaller than observed values and fitted values in the range 0.00 to 0.10 are consistently larger than observed values.
4	Raoulia hookeri	1566	805	2									4	Raoulia hookeri	1		P			6	Anaphaliodes bellioides	1
5	Raoulia hookeri	1050	1320	2									5	Raoulia hookeri	1		VG			7	Anaphaliodes bellioides	0		Message: the error variance does not appear to be constant: intermediate responses are more variable than small or large responses.
6	Raoulia hookeri	1140	806	2									6	Raoulia hookeri	1		P			8	Anaphaliodes bellioides	0
7	Raoulia hookeri	690	1230	2									7	Raoulia hookeri	1		G			9	Anaphaliodes bellioides	0
8	Raoulia hookeri	990	495	2									8	Raoulia hookeri	1		G			10	Anaphaliodes bellioides	1		Estimates of parameters
9	Raoulia hookeri	360	286	2									9	Raoulia hookeri	1		P			1	Acaena inermis	1
10	Raoulia hookeri	308	720	2	100								10	Raoulia hookeri	1	100	G			2	Acaena inermis	0							antilog of
1	Anaphaliodes bellioides	1040	756	2									1	Anaphaliodes bellioides	1		P			3	Acaena inermis	1		Parameter	estimate	s.e.	t(*)	t pr.	estimate
2	Anaphaliodes bellioides	680	1	2									2	Anaphaliodes bellioides	1		G			4	Acaena inermis	1		Constant	0.405	0.645	0.63	0.53	1.5
3	Anaphaliodes bellioides	1696	1125	2									3	Anaphaliodes bellioides	0					5	Acaena inermis	0		Treatment Acaena inermis purpurea
4	Anaphaliodes bellioides	1050	462	2									4	Anaphaliodes bellioides	0					6	Acaena inermis	0			1.79	1.24	1.45	0.147	6
5	Anaphaliodes bellioides	1504	980	2									5	Anaphaliodes bellioides	0					7	Acaena inermis	1		Treatment Anaphaliodes bellioides
6	Anaphaliodes bellioides	600	690	2									6	Anaphaliodes bellioides	1		P			8	Acaena inermis	0			-0.811	0.913	-0.89	0.374	0.4444
7	Anaphaliodes bellioides	425	0	1									7	Anaphaliodes bellioides	0					9	Acaena inermis	1		Treatment Geranium sessiliflorum
8	Anaphaliodes bellioides	180	225	2									8	Anaphaliodes bellioides	0					10	Acaena inermis	1			1.79	1.24	1.45	0.147	6
9	Anaphaliodes bellioides	40	0	1									9	Anaphaliodes bellioides	0					1	Hebe chathamica	1		Treatment Hebe chathamica	0.98	1.02	0.96	0.337	2.667
10	Anaphaliodes bellioides	500	125	2	90								10	Anaphaliodes bellioides	1	40	P			2	Hebe chathamica	1		Treatment Leptinella dioica (leafy)
1	Acaena inermis	1875	2668	2									1	Acaena inermis	1		G			3	Hebe chathamica	0			9.8	31.9	0.31	0.758	18426
2	Acaena inermis	0	0	0									2	Acaena inermis	0					4	Hebe chathamica	1		Treatment Leptinella squalida (club)
3	Acaena inermis	0	50	1									3	Acaena inermis	1		P			5	Hebe chathamica	1			-0.405	0.904	-0.45	0.654	0.6667
4	Acaena inermis	1840	3410	2									4	Acaena inermis	1		P			6	Hebe chathamica	0		Treatment Muehlenbeckia axillaris
5	Acaena inermis	1890	0	1									5	Acaena inermis	0					7	Hebe chathamica	1			9.8	31.9	0.31	0.758	18426
6	Acaena inermis	1575	0	1									6	Acaena inermis	0					8	Hebe chathamica	1		Treatment Muehlenbeckia ephedrioides
7	Acaena inermis	0	600	1									7	Acaena inermis	1		P			9	Hebe chathamica	1			-12	62.3	-0.19	0.848	6.322e-06
8	Acaena inermis	1	0	1									8	Acaena inermis	0					10	Hebe chathamica	1		Treatment Pratia angulata	0.442	0.945	0.47	0.64	1.556
9	Acaena inermis	2000	0	1									9	Acaena inermis	1		VG			1	Muehlenbeckia ephedrioides	0		Treatment Raoulia hookeri	9.8	31.9	0.31	0.758	18426
10	Acaena inermis	130	150	2	60								10	Acaena inermis	1	60	G			2	Muehlenbeckia ephedrioides	0		Treatment Raoulia subsericea
1	Hebe chathamica	1260	1050	2									1	Hebe chathamica	1		P			3	Muehlenbeckia ephedrioides	0			-2.6	1.24	-2.11	0.035	0.07407
2	Hebe chathamica	3250	1200	2									2	Hebe chathamica	1		G			4	Muehlenbeckia ephedrioides	0		Treatment Scleranthus uniflorus
3	Hebe chathamica	720	1200	2									3	Hebe chathamica	0					5	Muehlenbeckia ephedrioides	0			0.98	1.02	0.96	0.337	2.667
4	Hebe chathamica	4400	3220	2									4	Hebe chathamica	1		VG			6	Muehlenbeckia ephedrioides	0
5	Hebe chathamica	2925	3195	2									5	Hebe chathamica	1		VG			7	Muehlenbeckia ephedrioides	0		Message: s.e.s are based on dispersion parameter with value 1.
6	Hebe chathamica	750	2288	2									6	Hebe chathamica	0					8	Muehlenbeckia ephedrioides	0
7	Hebe chathamica	75	150	2									7	Hebe chathamica	1		P			9	Muehlenbeckia ephedrioides	0		Parameters for factors are differences compared with the reference level:
8	Hebe chathamica	1750	1500	2									8	Hebe chathamica	1		G			10	Muehlenbeckia ephedrioides	0			Factor	Reference level
9	Hebe chathamica	1800	2160	2									9	Hebe chathamica	1		VG			1	Acaena inermis purpurea	1			Treatment	Acaena inermis
10	Hebe chathamica	1260	1705	2	100								10	Hebe chathamica	1	80	G			2	Acaena inermis purpurea	1
1	Muehlenbeckia ephedrioides	45	15	2									1	Muehlenbeckia ephedrioides	0					3	Acaena inermis purpurea	1
2	Muehlenbeckia ephedrioides	15	35	2									2	Muehlenbeckia ephedrioides	0					4	Acaena inermis purpurea	1		Accumulated analysis of deviance				write at F12,117=6.04
3	Muehlenbeckia ephedrioides	0	0	1									3	Muehlenbeckia ephedrioides	0					5	Acaena inermis purpurea	1
4	Muehlenbeckia ephedrioides	14	135	2									4	Muehlenbeckia ephedrioides	0					6	Acaena inermis purpurea	0					mean	deviance	approx
5	Muehlenbeckia ephedrioides	2	0	1									5	Muehlenbeckia ephedrioides	0					7	Acaena inermis purpurea	1		Change	d.f.	deviance	F	ratio	chi pr
6	Muehlenbeckia ephedrioides	15	0	1									6	Muehlenbeckia ephedrioides	0					8	Acaena inermis purpurea	1		Treatment	12	72.5036	6.042	6.04	<.001
7	Muehlenbeckia ephedrioides	10	1	2									7	Muehlenbeckia ephedrioides	0					9	Acaena inermis purpurea	1		Residual	117	92.5241	0.7908
8	Muehlenbeckia ephedrioides	5	6	2									8	Muehlenbeckia ephedrioides	0					10	Acaena inermis purpurea	1		Total	129	165.028	1.2793
9	Muehlenbeckia ephedrioides	0	5	1									9	Muehlenbeckia ephedrioides	0					1	Scleranthus uniflorus	0
10	Muehlenbeckia ephedrioides	10	50	2	80								10	Muehlenbeckia ephedrioides	0	0				2	Scleranthus uniflorus	1		Message: ratios are based on dispersion parameter with value 1
1	Acaena inermis purpurea	1085	1140	2									1	Acaena inermis purpurea	1		VG			3	Scleranthus uniflorus	0
2	Acaena inermis purpurea	2800	3600	2									2	Acaena inermis purpurea	1		G			4	Scleranthus uniflorus	1		39 RWALD
3	Acaena inermis purpurea	1800	1890	2									3	Acaena inermis purpurea	1		G			5	Scleranthus uniflorus	1
4	Acaena inermis purpurea	5225	3325	2									4	Acaena inermis purpurea	1		VG			6	Scleranthus uniflorus	1		Wald tests for dropping terms
5	Acaena inermis purpurea	7830	0	2									5	Acaena inermis purpurea	1		VG			7	Scleranthus uniflorus	1
6	Acaena inermis purpurea	2975	2100	2									6	Acaena inermis purpurea	0					8	Scleranthus uniflorus	1			Term	Wald statistic	d.f.	chi. pr.
7	Acaena inermis purpurea	3010	1500	2									7	Acaena inermis purpurea	1		VG			9	Scleranthus uniflorus	1			Treatment	17.41	12	0.135
8	Acaena inermis purpurea	2046	0	2									8	Acaena inermis purpurea	1		VG			10	Scleranthus uniflorus	1
9	Acaena inermis purpurea	390	570	2									9	Acaena inermis purpurea	1		G			1	Leptinella dioica (leafy)	1
10	Acaena inermis purpurea	2145	1020	2	100								10	Acaena inermis purpurea	1	90	G			2	Leptinella dioica (leafy)	1
1	Scleranthus uniflorus	0	150	2									1	Scleranthus uniflorus	0					3	Leptinella dioica (leafy)	1
2	Scleranthus uniflorus	300	1680	2									2	Scleranthus uniflorus	1		G			4	Leptinella dioica (leafy)	1
3	Scleranthus uniflorus	306	1190	2									3	Scleranthus uniflorus	0					5	Leptinella dioica (leafy)	1
4	Scleranthus uniflorus	900	2491	2									4	Scleranthus uniflorus	1		P			6	Leptinella dioica (leafy)	1		Model checking…
5	Scleranthus uniflorus	702	529	2									5	Scleranthus uniflorus	1		G			7	Leptinella dioica (leafy)	1
6	Scleranthus uniflorus	700	1680	2									6	Scleranthus uniflorus	1		G			8	Leptinella dioica (leafy)	1
7	Scleranthus uniflorus	2256	518	2									7	Scleranthus uniflorus	1		P			9	Leptinella dioica (leafy)	1
8	Scleranthus uniflorus	1739	930	2									8	Scleranthus uniflorus	1		P			10	Leptinella dioica (leafy)	1
9	Scleranthus uniflorus	480	455	2									9	Scleranthus uniflorus	1		G			1	Pratia angulata	0
10	Scleranthus uniflorus	600	810	2	100								10	Scleranthus uniflorus	1	80	P			2	Pratia angulata	1
1	Leptinella dioica (leafy)	1500	960	2									1	Leptinella dioica (leafy)	1		VG			3	Pratia angulata	1
2	Leptinella dioica (leafy)	3600	3240	2									2	Leptinella dioica (leafy)	1		G			4	Pratia angulata	1
3	Leptinella dioica (leafy)	1240	1950	2									3	Leptinella dioica (leafy)	1		G			5	Pratia angulata	1
4	Leptinella dioica (leafy)	5850	4592	2									4	Leptinella dioica (leafy)	1		VG			6	Pratia angulata	0
5	Leptinella dioica (leafy)	8100	0	2									5	Leptinella dioica (leafy)	1		VG			7	Pratia angulata	1
6	Leptinella dioica (leafy)	525	2490	2									6	Leptinella dioica (leafy)	1		VG			8	Pratia angulata	0
7	Leptinella dioica (leafy)	2700	1674	2									7	Leptinella dioica (leafy)	1		G			9	Pratia angulata	1
8	Leptinella dioica (leafy)	1750	1610	2									8	Leptinella dioica (leafy)	1		VG			10	Pratia angulata	1
9	Leptinella dioica (leafy)	672	1920	2									9	Leptinella dioica (leafy)	1		VG			1	Raoulia subsericea	0
10	Leptinella dioica (leafy)	2430	2240	2	100								10	Leptinella dioica (leafy)	1	100	VG			2	Raoulia subsericea	0
1	Pratia angulata	850	1230	2									1	Pratia angulata	0					3	Raoulia subsericea	0
2	Pratia angulata	1740	880	2									2	Pratia angulata	1		P			4	Raoulia subsericea	1
3	Pratia angulata	1400	1050	2									3	Pratia angulata	1		P			5	Raoulia subsericea	0
4	Pratia angulata	2450	3000	2									4	Pratia angulata	1		G			6	Raoulia subsericea	0
5	Pratia angulata	1820	1485	2									5	Pratia angulata	1		G			7	Raoulia subsericea	0
6	Pratia angulata	3800	2250	2									6	Pratia angulata	0					8	Raoulia subsericea	0
7	Pratia angulata	1500	1380	2									7	Pratia angulata	1		G			9	Raoulia subsericea	0
8	Pratia angulata	1820	880	2									8	Pratia angulata	0					10	Raoulia subsericea	0
9	Pratia angulata	950	2700	2									9	Pratia angulata	1		G			1	Geranium sessiliflorum	1
10	Pratia angulata	1200	1500	2	100								10	Pratia angulata	1	70	P			2	Geranium sessiliflorum	1
1	Raoulia subsericea	120	120	2									1	Raoulia subsericea	0					3	Geranium sessiliflorum	1
2	Raoulia subsericea	20	6	2									2	Raoulia subsericea	0					4	Geranium sessiliflorum	1
3	Raoulia subsericea	0	0	0									3	Raoulia subsericea	0					5	Geranium sessiliflorum	1
4	Raoulia subsericea	300	210	2									4	Raoulia subsericea	1		P			6	Geranium sessiliflorum	1
5	Raoulia subsericea	10	72	2									5	Raoulia subsericea	0					7	Geranium sessiliflorum	1
6	Raoulia subsericea	0	0	0									6	Raoulia subsericea	0					8	Geranium sessiliflorum	1
7	Raoulia subsericea	60	0	1									7	Raoulia subsericea	0					9	Geranium sessiliflorum	1
8	Raoulia subsericea	0	100	1									8	Raoulia subsericea	0					10	Geranium sessiliflorum	0
9	Raoulia subsericea	0	0	0									9	Raoulia subsericea	0					1	Muehlenbeckia axillaris	1
10	Raoulia subsericea	221	204	2	60								10	Raoulia subsericea	0	10				2	Muehlenbeckia axillaris	1
1	Geranium sessiliflorum	1000	700	2									1	Geranium sessiliflorum	1		G			3	Muehlenbeckia axillaris	1
2	Geranium sessiliflorum	810	450	2									2	Geranium sessiliflorum	1		G			4	Muehlenbeckia axillaris	1
3	Geranium sessiliflorum	3025	2400	2									3	Geranium sessiliflorum	1		VG			5	Muehlenbeckia axillaris	1
4	Geranium sessiliflorum	1300	1100	2									4	Geranium sessiliflorum	1		VG			6	Muehlenbeckia axillaris	1
5	Geranium sessiliflorum	1500	1800	2									5	Geranium sessiliflorum	1		G			7	Muehlenbeckia axillaris	1
6	Geranium sessiliflorum	1804	960	2									6	Geranium sessiliflorum	1		G			8	Muehlenbeckia axillaris	1
7	Geranium sessiliflorum	1748	272	2									7	Geranium sessiliflorum	1		P			9	Muehlenbeckia axillaris	1
8	Geranium sessiliflorum	345	450	2									8	Geranium sessiliflorum	1		P			10	Muehlenbeckia axillaris	1
9	Geranium sessiliflorum	484	912	2									9	Geranium sessiliflorum	1		P
10	Geranium sessiliflorum	546	640	2	100								10	Geranium sessiliflorum	0	90
1	Muehlenbeckia axillaris	1575	2080	2									1	Muehlenbeckia axillaris	1		VG
2	Muehlenbeckia axillaris	1620	1980	2									2	Muehlenbeckia axillaris	1		VG
3	Muehlenbeckia axillaris	1600	1800	2									3	Muehlenbeckia axillaris	1		VG
4	Muehlenbeckia axillaris	1890	2640	2									4	Muehlenbeckia axillaris	1		VG
5	Muehlenbeckia axillaris	1350	555	2									5	Muehlenbeckia axillaris	1		G
6	Muehlenbeckia axillaris	1800	1925	2									6	Muehlenbeckia axillaris	1		VG
7	Muehlenbeckia axillaris	840	51	2									7	Muehlenbeckia axillaris	1		G
8	Muehlenbeckia axillaris	50	320	2									8	Muehlenbeckia axillaris	1		P
9	Muehlenbeckia axillaris	1350	935	2									9	Muehlenbeckia axillaris	1		VG
10	Muehlenbeckia axillaris	1250	900	2	100								10	Muehlenbeckia axillaris	1	100	VG

## Sheet: Diversity Aug 08, Table 3
All data, Aug 08					Reduced to non-zero trts
Block	individuals	Species	Group	Shannon-Weiner H		Block!			Group!	Shannon-Weiner H		Analysis of variance
1	0	0	Grass	0
2	0	0	Grass	0								Variate: Shannon_Weiner_H
3	1	1	Grass	0
4	0	0	Grass	0								Source of variation	d.f.	s.s.	m.s.	v.r.	F pr.
5	0	0	Grass	0								Block	9	3.8108	0.4234	2.58	0.01
6	1	1	Grass	0								Group	12	14.8075	1.234	7.51	<.001
7	0	0	Grass	0								Residual	108	17.7522	0.1644
8	0	0	Grass	0								Total	129	36.3705
9	0	0	Grass	0
10	0	0	Grass	0
1	0	0	Control	0								Message: the following units have large residuals.
2	0	0	Control	0
3	0	0	Control	0								*units* 83	1.228	s.e. 0.370
4	0	0	Control	0								*units* 101	1.1	s.e. 0.370
5	0	0	Control	0
6	0	0	Control	0
7	0	0	Control	0								Tables of means
8	0	0	Control	0
9	0	0	Control	0								Variate: Shannon_Weiner_H
10	1	1	Control	0
1	0	0	A. purpurea	0		1			A. purpurea	0		Grand mean 0.362
2	6	3	A. purpurea	1.011		2			A. purpurea	1.011
3	4	3	A. purpurea	1.04		3			A. purpurea	1.04			Block	1	2	3	4	5	6	7
4	3	3	A. purpurea	1.099		4			A. purpurea	1.099				0.129	0.383	0.59	0.702	0.289	0.293	0.236
5	1	1	A. purpurea	0		5			A. purpurea	0
6	3	2	A. purpurea	0.637		6			A. purpurea	0.637			Block	8	9	10
7	0	0	A. purpurea	0		7			A. purpurea	0				0.178	0.357	0.465
8	1	1	A. purpurea	0		8			A. purpurea	0
9	2	2	A. purpurea	0.693		9			A. purpurea	0.693			Group	A. bellidioides	A. inermis	A. purpurea	D. australe
10	0	0	A. purpurea	0		10			A. purpurea	0				0.713	0.149	0.448	0.069
1	0	0	A. inermis	0		1			A. inermis	0
2	1	1	A. inermis	0		2			A. inermis	0			Group	G. sessiflora	H. chathamica	L. dioica	L. squalida
3	6	2	A. inermis	0.451		3			A. inermis	0.451				1.114	0.948	0.347	0.263
4	0	0	A. inermis	0		4			A. inermis	0
5	0	0	A. inermis	0		5			A. inermis	0			Group	M. axillaris	M. ephedroides	P. angulata	R. hookerii
6	1	1	A. inermis	0		6			A. inermis	0				0.277	0.069	0.173	0.069
7	0	0	A. inermis	0		7			A. inermis	0
8	0	0	A. inermis	0		8			A. inermis	0			Group	R. subsericea
9	0	0	A. inermis	0		9			A. inermis	0				0.069
10	4	3	A. inermis	1.04		10			A. inermis	1.04
1	0	0	A. bellidioides	0		1			A. bellidioides	0
2	1	1	A. bellidioides	0		2			A. bellidioides	0		Least significant differences of means (5% level)
3	5	4	A. bellidioides	1.332		3			A. bellidioides	1.332
4	4	4	A. bellidioides	1.386		4			A. bellidioides	1.386		Table	Block	Group
5	5	4	A. bellidioides	1.332		5			A. bellidioides	1.332		rep.	13	10
6	1	1	A. bellidioides	0		6			A. bellidioides	0		d.f.	108	108
7	3	2	A. bellidioides	0.637		7			A. bellidioides	0.637		l.s.d.	0.3152	0.3594
8	1	1	A. bellidioides	0		8			A. bellidioides	0
9	4	2	A. bellidioides	1.055		9			A. bellidioides	1.055				Shannon-Weiner H
10	4	4	A. bellidioides	1.386		10			A. bellidioides	1.386			Native plant	2008-08-01
1	0	0	D. australe	0		1			D. australe	0			G. sessiflora	1.1144
2	0	0	D. australe	0		2			D. australe	0			H. chathamica	0.948
3	1	1	D. australe	0		3			D. australe	0			A. bellidioides	0.7128
4	1	1	D. australe	0		4			D. australe	0			A. purpurea	0.448
5	2	2	D. australe	0.6931		5			D. australe	0.6931			L. dioica	0.3471
6	0	0	D. australe	0		6			D. australe	0			M. axillaris	0.2773
7	0	0	D. australe	0		7			D. australe	0			L. squalida	0.2628
8	0	0	D. australe	0		8			D. australe	0			P. angulata	0.1733
9	0	0	D. australe	0		9			D. australe	0			A. inermis	0.1491
10	1	1	D. australe	0		10			D. australe	0			D. australe	0.0693
1	1	1	G. sessiflora	0		1			G. sessiflora	0			M. ephedroides	0.0693
2	10	7	G. sessiflora	1.834		2			G. sessiflora	1.834			R. hookerii	0.0693
3	5	4	G. sessiflora	1.04		3			G. sessiflora	1.04			R. subsericea	0.0693
4	16	5	G. sessiflora	1.3		4			G. sessiflora	1.3			S. uniflorus	(0)
5	4	3	G. sessiflora	1.04		5			G. sessiflora	1.04			Ryegrass inter-row	(0)
6	4	4	G. sessiflora	1.386		6			G. sessiflora	1.386			Bare earth	(0)
7	2	2	G. sessiflora	0.6931		7			G. sessiflora	0.6931			LSD(5%)	0.3594
8	7	4	G. sessiflora	1.277		8			G. sessiflora	1.277			LSEffect(5%)	0.254134
9	3	3	G. sessiflora	1.099		9			G. sessiflora	1.099
10	7	5	G. sessiflora	1.475		10			G. sessiflora	1.475
1	3	2	H. chathamica	0.6365		1			H. chathamica	0.6365
2	5	4	H. chathamica	1.099		2			H. chathamica	1.099
3	4	3	H. chathamica	1.04		3			H. chathamica	1.04
4	8	5	H. chathamica	1.386		4			H. chathamica	1.386
5	0	0	H. chathamica	0		5			H. chathamica	0
6	3	3	H. chathamica	1.099		6			H. chathamica	1.099
7	4	3	H. chathamica	1.04		7			H. chathamica	1.04
8	4	3	H. chathamica	1.04		8			H. chathamica	1.04
9	3	3	H. chathamica	1.099		9			H. chathamica	1.099
10	3	2	H. chathamica	1.04		10			H. chathamica	1.04
1	0	0	L. squalida	0		1			L. squalida	0
2	1	1	L. squalida	0		2			L. squalida	0
3	0	0	L. squalida	0		3			L. squalida	0
4	6	4	L. squalida	1.242		4			L. squalida	1.242
5	1	1	L. squalida	0		5			L. squalida	0
6	2	2	L. squalida	0.6931		6			L. squalida	0.6931
7	0	0	L. squalida	0		7			L. squalida	0
8	0	0	L. squalida	0		8			L. squalida	0
9	2	2	L. squalida	0.6931		9			L. squalida	0.6931
10	0	0	L. squalida	0		10			L. squalida	0
1	0	0	L. dioica	0		1			L. dioica	0
2	1	1	L. dioica	0		2			L. dioica	0
3	4	3	L. dioica	1.04		3			L. dioica	1.04
4	5	4	L. dioica	1.332		4			L. dioica	1.332
5	0	0	L. dioica	0		5			L. dioica	0
6	1	1	L. dioica	0		6			L. dioica	0
7	0	0	L. dioica	0		7			L. dioica	0
8	1	1	L. dioica	0		8			L. dioica	0
9	0	0	L. dioica	0		9			L. dioica	0
10	3	3	L. dioica	1.099		10			L. dioica	1.099
1	1	1	M. axillaris	0		1			M. axillaris	0
2	3	2	M. axillaris	1.04		2			M. axillaris	1.04
3	8	6	M. axillaris	1.733		3			M. axillaris	1.733
4	1	1	M. axillaris	0		4			M. axillaris	0
5	0	0	M. axillaris	0		5			M. axillaris	0
6	1	1	M. axillaris	0		6			M. axillaris	0
7	1	1	M. axillaris	0		7			M. axillaris	0
8	0	0	M. axillaris	0		8			M. axillaris	0
9	0	0	M. axillaris	0		9			M. axillaris	0
10	0	0	M. axillaris	0		10			M. axillaris	0
1	0	0	M. ephedroides	0		1			M. ephedroides	0
2	1	1	M. ephedroides	0		2			M. ephedroides	0
3	1	1	M. ephedroides	0		3			M. ephedroides	0
4	2	2	M. ephedroides	0.6931		4			M. ephedroides	0.6931
5	0	0	M. ephedroides	0		5			M. ephedroides	0
6	0	0	M. ephedroides	0		6			M. ephedroides	0
7	0	0	M. ephedroides	0		7			M. ephedroides	0
8	1	1	M. ephedroides	0		8			M. ephedroides	0
9	0	0	M. ephedroides	0		9			M. ephedroides	0
10	0	0	M. ephedroides	0		10			M. ephedroides	0
1	4	3	P. angulata	1.04		1			P. angulata	1.04
2	0	0	P. angulata	0		2			P. angulata	0
3	1	1	P. angulata	0		3			P. angulata	0
4	2	1	P. angulata	0.6931		4			P. angulata	0.6931
5	0	0	P. angulata	0		5			P. angulata	0
6	0	0	P. angulata	0		6			P. angulata	0
7	0	0	P. angulata	0		7			P. angulata	0
8	1	1	P. angulata	0		8			P. angulata	0
9	0	0	P. angulata	0		9			P. angulata	0
10	0	0	P. angulata	0		10			P. angulata	0
1	1	1	R. hookerii	0		1			R. hookerii	0
2	0	0	R. hookerii	0		2			R. hookerii	0
3	2	1	R. hookerii	0		3			R. hookerii	0
4	0	0	R. hookerii	0		4			R. hookerii	0
5	0	0	R. hookerii	0		5			R. hookerii	0
6	0	0	R. hookerii	0		6			R. hookerii	0
7	2	2	R. hookerii	0.6931		7			R. hookerii	0.6931
8	9	1	R. hookerii	0		8			R. hookerii	0
9	0	0	R. hookerii	0		9			R. hookerii	0
10	1	1	R. hookerii	0		10			R. hookerii	0
1	0	0	R. subsericea	0		1			R. subsericea	0
2	1	1	R. subsericea	0		2			R. subsericea	0
3	3	1	R. subsericea	0		3			R. subsericea	0
4	1	1	R. subsericea	0		4			R. subsericea	0
5	2	2	R. subsericea	0.6931		5			R. subsericea	0.6931
6	1	1	R. subsericea	0		6			R. subsericea	0
7	0	0	R. subsericea	0		7			R. subsericea	0
8	0	0	R. subsericea	0		8			R. subsericea	0
9	0	0	R. subsericea	0		9			R. subsericea	0
10	0	0	R. subsericea	0		10			R. subsericea	0

## Sheet: Diversity Jan 09, Table 3
All data, Jan 09					Reduced to non-zero trts
block/
sample	Group	Ind	Species	Shannon-Weiner H		block!	Group!	Ind	Species	Shannon-WeinerH
1	Grass	0	0	0		1	Grass	0	0	0		Analysis of variance
2	Grass	3	2	0.6365		2	Grass	3	2	0.6365
3	Grass	6	4	1.242		3	Grass	6	4	1.242		Variate: Shannon_WeinerH
4	Grass	0	0	0		4	Grass	0	0	0
5	Grass	0	0	0		5	Grass	0	0	0		Source of variation	d.f.	s.s.	m.s.	v.r.	F pr.
6	Grass	3	1	0		6	Grass	3	1	0		block	9	3.1687	0.3521	1.17	0.325
7	Grass	2	1	0		7	Grass	2	1	0		Group	11	18.9966	1.727	5.72	<.001
8	Grass	2	1	0		8	Grass	2	1	0		Residual	99	29.8784	0.3018
9	Grass	0	0	0		9	Grass	0	0	0		Total	119	52.0437
10	Grass	0	0	0		10	Grass	0	0	0
1	Control	0	0	0		1	Control	0	0	0
2	Control	0	0	0		2	Control	0	0	0		Message: the following units have large residuals.
3	Control	1	1	0		3	Control	1	1	0
4	Control	2	2	0.6931		4	Control	2	2	0.6931		*units* 44	-1.351	s.e. 0.499
5	Control	0	0	0		5	Control	0	0	0
6	Control	0	0	0		6	Control	0	0	0
7	Control	0	0	0		7	Control	0	0	0		Tables of means
8	Control	0	0	0		8	Control	0	0	0
9	Control	0	0	0		9	Control	0	0	0		Variate: Shannon_WeinerH
10	Control	0	0	0		10	Control	0	0	0
1	A. purpurea	18	4	0.6337		1	A. purpurea	18	4	0.6337		Grand mean 0.770
2	A. purpurea	10	3	0.639		2	A. purpurea	10	3	0.639
3	A. purpurea	1	1	0		3	A. purpurea	1	1	0			block	1	2	3	4	5	6	7
4	A. purpurea	39	10	1.336		4	A. purpurea	39	10	1.336				0.731	0.77	1.042	1.024	0.843	0.601	0.794
5	A. purpurea	7	3	0.7963		5	A. purpurea	7	3	0.7963
6	A. purpurea	5	3	0.9503		6	A. purpurea	5	3	0.9503			block	8	9	10
7	A. purpurea	10	2	0.3251		7	A. purpurea	10	2	0.3251				0.484	0.71	0.702
8	A. purpurea	4	1	0		8	A. purpurea	4	1	0
9	A. purpurea	13	4	0.7937		9	A. purpurea	13	4	0.7937			Group	Grass	Control	A. purpurea	A. inermis
10	A. purpurea	6	1	0		10	A. purpurea	6	1	0				0.188	0.069	0.547	0.918
1	A. inermis	10	7	1.834		1	A. inermis	10	7	1.834
2	A. inermis	5	5	1.609		2	A. inermis	5	5	1.609			Group	A. bellidioides	G. sessiflora	H. chathamica	L. squalida
3	A. inermis	8	4	1.255		3	A. inermis	8	4	1.255				1.098	1.17	0.244	0.976
4	A. inermis	2	2	0.6931		4	A. inermis	2	2	0.6931
5	A. inermis	0	0	0		5	A. inermis	0	0	0			Group	L. dioica	M. axillaris	P. angulata	R. hookerii
6	A. inermis	0	0	0		6	A. inermis	0	0	0				1.088	1.296	0.939	0.706
7	A. inermis	5	5	1.609		7	A. inermis	5	5	1.609
8	A. inermis	0	0	0		8	A. inermis	0	0	0
9	A. inermis	20	6	1.228		9	A. inermis	20	6	1.228		Least significant differences of means (5% level)
10	A. inermis	7	3	0.9557		10	A. inermis	7	3	0.9557
1	A. bellidioides	12	6	1.676		1	A. bellidioides	12	6	1.676		Table	block	Group
2	A. bellidioides	3	3	1.099		2	A. bellidioides	3	3	1.099		rep.	12	10
3	A. bellidioides	7	6	1.748		3	A. bellidioides	7	6	1.748		d.f.	99	99
4	A. bellidioides	0	0	0		4	A. bellidioides	0	0	0		l.s.d.	0.445	0.4875
5	A. bellidioides	14	4	1.277		5	A. bellidioides	14	4	1.277
6	A. bellidioides	17	7	1.793		6	A. bellidioides	17	7	1.793			LSD(5%)	0.4875
7	A. bellidioides	15	4	1.137		7	A. bellidioides	15	4	1.137			LSE(5%)	0.344715
8	A. bellidioides	3	2	0.6365		8	A. bellidioides	3	2	0.6365
9	A. bellidioides	0	0	0		9	A. bellidioides	0	0	0
10	A. bellidioides	5	5	1.609		10	A. bellidioides	5	5	1.609
1	G. sessiflora	3	1	0		1	G. sessiflora	3	1	0
2	G. sessiflora	5	5	1.609		2	G. sessiflora	5	5	1.609
3	G. sessiflora	13	5	1.602		3	G. sessiflora	13	5	1.602
4	G. sessiflora	7	4	1.427		4	G. sessiflora	7	4	1.427
5	G. sessiflora	15	4	1.381		5	G. sessiflora	15	4	1.381
6	G. sessiflora	30	3	0.3887		6	G. sessiflora	30	3	0.3887
7	G. sessiflora	11	6	1.54		7	G. sessiflora	11	6	1.54
8	G. sessiflora	12	6	1.474		8	G. sessiflora	12	6	1.474
9	G. sessiflora	25	6	0.9257		9	G. sessiflora	25	6	0.9257
10	G. sessiflora	26	6	1.356		10	G. sessiflora	26	6	1.356
1	H. chathamica	96	5	0.3969		1	H. chathamica	96	5	0.3969
2	H. chathamica	154	8	0.2942		2	H. chathamica	154	8	0.2942
3	H. chathamica	1	1	0		3	H. chathamica	1	1	0
4	H. chathamica	155	3	0.1344		4	H. chathamica	155	3	0.1344
5	H. chathamica	98	4	0.2695		5	H. chathamica	98	4	0.2695
6	H. chathamica	33	4	0.7901		6	H. chathamica	33	4	0.7901
7	H. chathamica	31	2	0.1425		7	H. chathamica	31	2	0.1425
8	H. chathamica	55	2	0.09088		8	H. chathamica	55	2	0.09088
9	H. chathamica	213	4	0.0895		9	H. chathamica	213	4	0.0895
10	H. chathamica	41	3	0.2287		10	H. chathamica	41	3	0.2287
1	L. squalida	3	3	1.099		1	L. squalida	3	3	1.099
2	L. squalida	5	1	0		2	L. squalida	5	1	0
3	L. squalida	10	7	1.834		3	L. squalida	10	7	1.834
4	L. squalida	19	9	1.863		4	L. squalida	19	9	1.863
5	L. squalida	8	4	1.321		5	L. squalida	8	4	1.321
6	L. squalida	8	1	0		6	L. squalida	8	1	0
7	L. squalida	11	5	1.516		7	L. squalida	11	5	1.516
8	L. squalida	7	2	0.4101		8	L. squalida	7	2	0.4101
9	L. squalida	8	3	1.082		9	L. squalida	8	3	1.082
10	L. squalida	3	2	0.6365		10	L. squalida	3	2	0.6365
1	L. dioica	4	4	1.386		1	L. dioica	4	4	1.386
2	L. dioica	1	1	0		2	L. dioica	1	1	0
3	L. dioica	9	5	1.427		3	L. dioica	9	5	1.427
4	L. dioica	7	6	1.748		4	L. dioica	7	6	1.748
5	L. dioica	7	4	1.277		5	L. dioica	7	4	1.277
6	L. dioica	18	3	0.4258		6	L. dioica	18	3	0.4258
7	L. dioica	6	3	1.011		7	L. dioica	6	3	1.011
8	L. dioica	8	3	0.9003		8	L. dioica	8	3	0.9003
9	L. dioica	4	4	1.386		9	L. dioica	4	4	1.386
10	L. dioica	8	4	1.321		10	L. dioica	8	4	1.321
1	M. axillaris	16	7	1.75		1	M. axillaris	16	7	1.75
2	M. axillaris	21	8	1.748		2	M. axillaris	21	8	1.748
3	M. axillaris	5	5	1.524		3	M. axillaris	5	5	1.524
4	M. axillaris	5	5	1.609		4	M. axillaris	5	5	1.609
5	M. axillaris	3	3	1.099		5	M. axillaris	3	3	1.099
6	M. axillaris	8	5	1.386		6	M. axillaris	8	5	1.386
7	M. axillaris	5	4	1.332		7	M. axillaris	5	4	1.332
8	M. axillaris	1	1	0		8	M. axillaris	1	1	0
9	M. axillaris	6	5	1.561		9	M. axillaris	6	5	1.561
10	M. axillaris	7	3	0.9557		10	M. axillaris	7	3	0.9557
1	P. angulata	17	1	0		1	P. angulata	17	1	0
2	P. angulata	3	1	0		2	P. angulata	3	1	0
3	P. angulata	11	6	1.421		3	P. angulata	11	6	1.421
4	P. angulata	27	11	2.306		4	P. angulata	27	11	2.306
5	P. angulata	14	4	1.675		5	P. angulata	14	4	1.675
6	P. angulata	12	2	0.2868		6	P. angulata	12	2	0.2868
7	P. angulata	52	7	0.9127		7	P. angulata	52	7	0.9127
8	P. angulata	12	3	0.8676		8	P. angulata	12	3	0.8676
9	P. angulata	33	8	1.169		9	P. angulata	33	8	1.169
10	P. angulata	14	4	0.755		10	P. angulata	14	4	0.755
1	R. hookerii	6	1	0		1	R. hookerii	6	1	0
2	R. hookerii	5	5	1.609		2	R. hookerii	5	5	1.609
3	R. hookerii	6	2	0.4506		3	R. hookerii	6	2	0.4506
4	R. hookerii	56	5	0.4736		4	R. hookerii	56	5	0.4736
5	R. hookerii	27	6	1.018		5	R. hookerii	27	6	1.018
6	R. hookerii	18	4	1.191		6	R. hookerii	18	4	1.191
7	R. hookerii	2	1	0		7	R. hookerii	2	1	0
8	R. hookerii	14	5	1.433		8	R. hookerii	14	5	1.433
9	R. hookerii	12	2	0.2868		9	R. hookerii	12	2	0.2868
10	R. hookerii	16	3	0.6019		10	R. hookerii	16	3	0.6019
1	S. uniflorus	0	0	0
2	S. uniflorus	3	1	0
3	S. uniflorus	0	0	0
4	S. uniflorus	1	1	0
5	S. uniflorus	2	1	0
6	S. uniflorus	1	1	0
7	S. uniflorus	5	1	0
8	S. uniflorus	0	0	0
9	S. uniflorus	7	1	0
10	S. uniflorus	0	0	0

## Sheet: Diversity Mar 09, Table 3
All data, Mar 09					Reduced to non-zero trts
sample	Group	Ind	Species	Shannon-Weiner H		block!	Group!	Ind	Species	Shannon-Weiner H		Analysis of variance
1	Grass	0	0	0		1	Grass	0	0	0
2	Grass	7	5	1.55		2	Grass	7	5	1.55		Variate: Shannon_Weiner_H
3	Grass	1	1	0		3	Grass	1	1	0
4	Grass	1	1	0		4	Grass	1	1	0		Source of variation	d.f.	s.s.	m.s.	v.r.	F pr.
5	Grass	2	2	0.6931		5	Grass	2	2	0.6931		block	9	5.7182	0.6354	2.46	0.014
6	Grass	1	1	0		6	Grass	1	1	0		Group	11	17.7858	1.6169	6.26	<.001
7	Grass	4	4	1.386		7	Grass	4	4	1.386		Residual	99	25.5819	0.2584
8	Grass	3	2	0.6365		8	Grass	3	2	0.6365		Total	119	49.086
9	Grass	1	1	0		9	Grass	1	1	0
10	Grass	0	0	0		10	Grass	0	0	0
1	Control	1	1	0								Tables of means
2	Control	0	0	0
3	Control	0	0	0								Variate: Shannon_Weiner_H
4	Control	0	0	0
5	Control	1	1	0								Grand mean 0.719
6	Control	1	1	0
7	Control	0	0	0									block	1	2	3	4	5	6	7
8	Control	1	1	0										0.661	0.921	0.707	1.019	0.8	0.44	0.834
9	Control	0	0	0
10	Control	0	0	0									block	8	9	10
1	A. purpurea	8	6	1.733		1	A. purpurea	8	6	1.733				0.235	0.809	0.761
2	A. purpurea	12	7	1.864		2	A. purpurea	12	7	1.864
3	A. purpurea	5	5	1.609		3	A. purpurea	5	5	1.609			Group	A. bellidioides	A. inermis	A. purpurea	G. sessiflora
4	A. purpurea	32	3	0.2771		4	A. purpurea	32	3	0.2771				0.571	0.793	1.102	1.313
5	A. purpurea	4	4	1.386		5	A. purpurea	4	4	1.386
6	A. purpurea	11	4	1.162		6	A. purpurea	11	4	1.162			Group	Grass	H. chathamica	L. dioica	L. squalida
7	A. purpurea	12	4	1.237		7	A. purpurea	12	4	1.237				0.427	0.769	0.503	0.52
8	A. purpurea	1	1	0		8	A. purpurea	1	1	0
9	A. purpurea	5	3	1.055		9	A. purpurea	5	3	1.055			Group	M. axillaris	P. angulata	R. hookerii	S. uniflorus
10	A. purpurea	2	2	0.6931		10	A. purpurea	2	2	0.6931				1.306	1.009	0.243	0.069
1	A. inermis	1	1	0		1	A. inermis	1	1	0
2	A. inermis	2	2	0.6931		2	A. inermis	2	2	0.6931
3	A. inermis	2	2	0.6931		3	A. inermis	2	2	0.6931		Least significant differences of means (5% level)
4	A. inermis	9	6	1.581		4	A. inermis	9	6	1.581
5	A. inermis	0	0	0		5	A. inermis	0	0	0		Table	block	Group
6	A. inermis	0	0	0		6	A. inermis	0	0	0		rep.	12	10
7	A. inermis	15	8	1.934		7	A. inermis	15	8	1.934		d.f.	99	99
8	A. inermis	0	0	0		8	A. inermis	0	0	0		l.s.d.	0.4118	0.4511
9	A. inermis	7	5	1.475		9	A. inermis	7	5	1.475
10	A. inermis	7	5	1.55		10	A. inermis	7	5	1.55			LSD(5%)	0.4511
1	A. bellidioides	7	3	0.9557		1	A. bellidioides	7	3	0.9557			LSE(5%)	0.318976
2	A. bellidioides	0	0	0		2	A. bellidioides	0	0	0
3	A. bellidioides	12	6	1.633		3	A. bellidioides	12	6	1.633
4	A. bellidioides	2	2	0.6931		4	A. bellidioides	2	2	0.6931
5	A. bellidioides	2	3	0.6931		5	A. bellidioides	2	3	0.6931
6	A. bellidioides	2	2	0.6931		6	A. bellidioides	2	2	0.6931
7	A. bellidioides	8	2	0.3768		7	A. bellidioides	8	2	0.3768
8	A. bellidioides	0	0	0		8	A. bellidioides	0	0	0
9	A. bellidioides	0	0	0		9	A. bellidioides	0	0	0
10	A. bellidioides	8	2	0.6616		10	A. bellidioides	8	2	0.6616
1	G. sessiflora	9	5	1.465		1	G. sessiflora	9	5	1.465
2	G. sessiflora	17	8	1.588		2	G. sessiflora	17	8	1.588
3	G. sessiflora	27	7	1.506		3	G. sessiflora	27	7	1.506
4	G. sessiflora	14	6	1.631		4	G. sessiflora	14	6	1.631
5	G. sessiflora	15	7	1.784		5	G. sessiflora	15	7	1.784
6	G. sessiflora	19	3	0.5367		6	G. sessiflora	19	3	0.5367
7	G. sessiflora	4	3	1.04		7	G. sessiflora	4	3	1.04
8	G. sessiflora	2	2	0.6931		8	G. sessiflora	2	2	0.6931
9	G. sessiflora	6	6	1.792		9	G. sessiflora	6	6	1.792
10	G. sessiflora	3	3	1.099		10	G. sessiflora	3	3	1.099
1	H. chathamica	5	2	0.5004		1	H. chathamica	5	2	0.5004
2	H. chathamica	44	7	1.043		2	H. chathamica	44	7	1.043
3	H. chathamica	3	2	0.6365		3	H. chathamica	3	2	0.6365
4	H. chathamica	30	5	1.212		4	H. chathamica	30	5	1.212
5	H. chathamica	20	4	0.9143		5	H. chathamica	20	4	0.9143
6	H. chathamica	5	5	1.609		6	H. chathamica	5	5	1.609
7	H. chathamica	13	2	0.2712		7	H. chathamica	13	2	0.2712
8	H. chathamica	143	3	0.0833		8	H. chathamica	143	3	0.0833
9	H. chathamica	115	5	0.2996		9	H. chathamica	115	5	0.2996
10	H. chathamica	16	6	1.124		10	H. chathamica	16	6	1.124
1	L. squalida	0	0	0		1	L. squalida	0	0	0
2	L. squalida	3	3	1.099		2	L. squalida	3	3	1.099
3	L. squalida	4	2	0.5623		3	L. squalida	4	2	0.5623
4	L. squalida	7	6	1.748		4	L. squalida	7	6	1.748
5	L. squalida	3	3	1.099		5	L. squalida	3	3	1.099
6	L. squalida	0	0	0		6	L. squalida	0	0	0
7	L. squalida	2	2	0.6931		7	L. squalida	2	2	0.6931
8	L. squalida	0	0	0		8	L. squalida	0	0	0
9	L. squalida	0	0	0		9	L. squalida	0	0	0
10	L. squalida	0	0	0		10	L. squalida	0	0	0
1	L. dioica	2	2	0.6931		1	L. dioica	2	2	0.6931
2	L. dioica	4	3	1.04		2	L. dioica	4	3	1.04
3	L. dioica	1	1	0		3	L. dioica	1	1	0
4	L. dioica	3	3	1.099		4	L. dioica	3	3	1.099
5	L. dioica	0	0	0		5	L. dioica	0	0	0
6	L. dioica	0	0	0		6	L. dioica	0	0	0
7	L. dioica	1	1	0		7	L. dioica	1	1	0
8	L. dioica	1	1	0		8	L. dioica	1	1	0
9	L. dioica	3	3	1.099		9	L. dioica	3	3	1.099
10	L. dioica	3	3	1.099		10	L. dioica	3	3	1.099
1	M. axillaris	13	6	1.525		1	M. axillaris	13	6	1.525
2	M. axillaris	9	6	1.677		2	M. axillaris	9	6	1.677
3	M. axillaris	7	4	1.154		3	M. axillaris	7	4	1.154
4	M. axillaris	10	5	1.505		4	M. axillaris	10	5	1.505
5	M. axillaris	2	2	0.6931		5	M. axillaris	2	2	0.6931
6	M. axillaris	7	4	1.277		6	M. axillaris	7	4	1.277
7	M. axillaris	3	3	1.099		7	M. axillaris	3	3	1.099
8	M. axillaris	6	2	0.4506		8	M. axillaris	6	2	0.4506
9	M. axillaris	14	8	2.008		9	M. axillaris	14	8	2.008
10	M. axillaris	8	6	1.667		10	M. axillaris	8	6	1.667
1	P. angulata	5	3	1.055		1	P. angulata	5	3	1.055
2	P. angulata	5	2	0.5004		2	P. angulata	5	2	0.5004
3	P. angulata	2	2	0.6931		3	P. angulata	2	2	0.6931
4	P. angulata	3	3	1.099		4	P. angulata	3	3	1.099
5	P. angulata	6	4	1.242		5	P. angulata	6	4	1.242
6	P. angulata	0	0	0		6	P. angulata	0	0	0
7	P. angulata	5	4	1.332		7	P. angulata	5	4	1.332
8	P. angulata	7	3	0.9557		8	P. angulata	7	3	0.9557
9	P. angulata	18	9	1.981		9	P. angulata	18	9	1.981
10	P. angulata	12	5	1.234		10	P. angulata	12	5	1.234
1	R. hookerii	1	1	0		1	R. hookerii	1	1	0
2	R. hookerii	0	0	0		2	R. hookerii	0	0	0
3	R. hookerii	0	0	0		3	R. hookerii	0	0	0
4	R. hookerii	2	2	0.6931		4	R. hookerii	2	2	0.6931
5	R. hookerii	3	3	1.099		5	R. hookerii	3	3	1.099
6	R. hookerii	1	1	0		6	R. hookerii	1	1	0
7	R. hookerii	3	2	0.6365		7	R. hookerii	3	2	0.6365
8	R. hookerii	1	1	0		8	R. hookerii	1	1	0
9	R. hookerii	3	1	0		9	R. hookerii	3	1	0
10	R. hookerii	0	0	0		10	R. hookerii	0	0	0
1	S. uniflorus	0	0	0		1	S. uniflorus	0	0	0
2	S. uniflorus	0	0	0		2	S. uniflorus	0	0	0
3	S. uniflorus	0	0	0		3	S. uniflorus	0	0	0
4	S. uniflorus	2	2	0.6931		4	S. uniflorus	2	2	0.6931
5	S. uniflorus	0	0	0		5	S. uniflorus	0	0	0
6	S. uniflorus	2	1	0		6	S. uniflorus	2	1	0
7	S. uniflorus	0	0	0		7	S. uniflorus	0	0	0
8	S. uniflorus	0	0	0		8	S. uniflorus	0	0	0
9	S. uniflorus	1	1	0		9	S. uniflorus	1	1	0
10	S. uniflorus	1	1	0		10	S. uniflorus	1	1	0

## Sheet: Spiders, Table 4
2008-08-01			Reduced to non-zero trts	2008-08-01					Spiders… Jan 2009			Reduced to non-zero trts						Spiders… Mar 2009			Reduced to non-zero trts
Rep	Treatment	Spiders		Rep!	Treatment!	Spiders	Spiders_m2
1	Grass	1							Block	Treatment	Spider		Block!	Treatment!	Spider	Spiders_m2		Block	Treatment	Araneae		Block!	Treatment!	Araneae	Spiders_m2
2	Grass	0							1	Grass	0		1	Grass	0	0		1	Grass	0		1	Grass	0	0
3	Grass	0							2	Grass	0		2	Grass	0	0		2	Grass	0		2	Grass	0	0
4	Grass	0							3	Grass	4		3	Grass	4	100		3	Grass	0		3	Grass	0	0
5	Grass	0							4	Grass	0		4	Grass	0	0		4	Grass	0		4	Grass	0	0
6	Grass	0							5	Grass	0		5	Grass	0	0		5	Grass	1		5	Grass	1	25
7	Grass	0							6	Grass	0		6	Grass	0	0		6	Grass	1		6	Grass	1	25
8	Grass	0							7	Grass	0		7	Grass	0	0		7	Grass	0		7	Grass	0	0
9	Grass	0							8	Grass	0		8	Grass	0	0		8	Grass	0		8	Grass	0	0
10	Grass	0							9	Grass	0		9	Grass	0	0		9	Grass	0		9	Grass	0	0
1	Control	0							10	Grass	0		10	Grass	0	0		10	Grass	0		10	Grass	0	0
2	Control	0							1	Control	0							1	Control	0
3	Control	0							2	Control	0							2	Control	0
4	Control	0							3	Control	1							3	Control	0
5	Control	0							4	Control	0							4	Control	0
6	Control	0							5	Control	0							5	Control	0
7	Control	0							6	Control	0							6	Control	0
8	Control	0							7	Control	0							7	Control	0
9	Control	0							8	Control	0							8	Control	0
10	Control	0							9	Control	0							9	Control	0
1	A. purpurea	0		1	A. purpurea	0	0		10	Control	0							10	Control	0
2	A. purpurea	4		2	A. purpurea	4	100		1	A. purpurea	0		1	A. purpurea	0	0		1	A. purpurea	0		1	A. purpurea	0	0
3	A. purpurea	0		3	A. purpurea	0	0		2	A. purpurea	0		2	A. purpurea	0	0		2	A. purpurea	6		2	A. purpurea	6	150
4	A. purpurea	0		4	A. purpurea	0	0		3	A. purpurea	0		3	A. purpurea	0	0		3	A. purpurea	1		3	A. purpurea	1	25
5	A. purpurea	0		5	A. purpurea	0	0		4	A. purpurea	0		4	A. purpurea	0	0		4	A. purpurea	1		4	A. purpurea	1	25
6	A. purpurea	1		6	A. purpurea	1	25		5	A. purpurea	1		5	A. purpurea	1	25		5	A. purpurea	3		5	A. purpurea	3	75
7	A. purpurea	0		7	A. purpurea	0	0		6	A. purpurea	0		6	A. purpurea	0	0		6	A. purpurea	3		6	A. purpurea	3	75
8	A. purpurea	1		8	A. purpurea	1	25		7	A. purpurea	0		7	A. purpurea	0	0		7	A. purpurea	0		7	A. purpurea	0	0
9	A. purpurea	0		9	A. purpurea	0	0		8	A. purpurea	0		8	A. purpurea	0	0		8	A. purpurea	2		8	A. purpurea	2	50
10	A. purpurea	0		10	A. purpurea	0	0		9	A. purpurea	3		9	A. purpurea	3	75		9	A. purpurea	2		9	A. purpurea	2	50
1	A. inermis	0		1	A. inermis	0	0		10	A. purpurea	0		10	A. purpurea	0	0		10	A. purpurea	0		10	A. purpurea	0	0
2	A. inermis	0		2	A. inermis	0	0		1	A. inermis	0		1	A. inermis	0	0		1	A. inermis	0		1	A. inermis	0	0
3	A. inermis	1		3	A. inermis	1	25		2	A. inermis	0		2	A. inermis	0	0		2	A. inermis	0		2	A. inermis	0	0
4	A. inermis	0		4	A. inermis	0	0		3	A. inermis	4		3	A. inermis	4	100		3	A. inermis	1		3	A. inermis	1	25
5	A. inermis	0		5	A. inermis	0	0		4	A. inermis	0		4	A. inermis	0	0		4	A. inermis	1		4	A. inermis	1	25
6	A. inermis	1		6	A. inermis	1	25		5	A. inermis	0		5	A. inermis	0	0		5	A. inermis	0		5	A. inermis	0	0
7	A. inermis	0		7	A. inermis	0	0		6	A. inermis	0		6	A. inermis	0	0		6	A. inermis	0		6	A. inermis	0	0
8	A. inermis	0		8	A. inermis	0	0		7	A. inermis	0		7	A. inermis	0	0		7	A. inermis	3		7	A. inermis	3	75
9	A. inermis	0		9	A. inermis	0	0		8	A. inermis	1		8	A. inermis	1	25		8	A. inermis	0		8	A. inermis	0	0
10	A. inermis	0		10	A. inermis	0	0		9	A. inermis	1		9	A. inermis	1	25		9	A. inermis	0		9	A. inermis	0	0
1	A. bellidioides	0		1	A. bellidioides	0	0		10	A. inermis	0		10	A. inermis	0	0		10	A. inermis	2		10	A. inermis	2	50
2	A. bellidioides	0		2	A. bellidioides	0	0		1	A. bellidioides	2		1	A. bellidioides	2	50		1	A. bellidioides	2		1	A. bellidioides	2	50
3	A. bellidioides	2		3	A. bellidioides	2	50		2	A. bellidioides	0		2	A. bellidioides	0	0		2	A. bellidioides	0		2	A. bellidioides	0	0
4	A. bellidioides	2		4	A. bellidioides	2	50		3	A. bellidioides	1		3	A. bellidioides	1	25		3	A. bellidioides	4		3	A. bellidioides	4	100
5	A. bellidioides	1		5	A. bellidioides	1	25		4	A. bellidioides	0		4	A. bellidioides	0	0		4	A. bellidioides	1		4	A. bellidioides	1	25
6	A. bellidioides	0		6	A. bellidioides	0	0		5	A. bellidioides	1		5	A. bellidioides	1	25		5	A. bellidioides	1		5	A. bellidioides	1	25
7	A. bellidioides	0		7	A. bellidioides	0	0		6	A. bellidioides	2		6	A. bellidioides	2	50		6	A. bellidioides	0		6	A. bellidioides	0	0
8	A. bellidioides	0		8	A. bellidioides	0	0		7	A. bellidioides	0		7	A. bellidioides	0	0		7	A. bellidioides	1		7	A. bellidioides	1	25
9	A. bellidioides	0		9	A. bellidioides	0	0		8	A. bellidioides	0		8	A. bellidioides	0	0		8	A. bellidioides	0		8	A. bellidioides	0	0
10	A. bellidioides	2		10	A. bellidioides	2	50		9	A. bellidioides	0		9	A. bellidioides	0	0		9	A. bellidioides	0		9	A. bellidioides	0	0
1	D. australe	0		1	D. australe	0	0		10	A. bellidioides	1		10	A. bellidioides	1	25		10	A. bellidioides	0		10	A. bellidioides	0	0
2	D. australe	0		2	D. australe	0	0		1	G. sessiflora	0		1	G. sessiflora	0	0		1	G. sessiflora	4		1	G. sessiflora	4	100
3	D. australe	1		3	D. australe	1	25		2	G. sessiflora	2		2	G. sessiflora	2	50		2	G. sessiflora	4		2	G. sessiflora	4	100
4	D. australe	1		4	D. australe	1	25		3	G. sessiflora	3		3	G. sessiflora	3	75		3	G. sessiflora	5		3	G. sessiflora	5	125
5	D. australe	0		5	D. australe	0	0		4	G. sessiflora	2		4	G. sessiflora	2	50		4	G. sessiflora	4		4	G. sessiflora	4	100
6	D. australe	0		6	D. australe	0	0		5	G. sessiflora	3		5	G. sessiflora	3	75		5	G. sessiflora	8		5	G. sessiflora	8	200
7	D. australe	0		7	D. australe	0	0		6	G. sessiflora	0		6	G. sessiflora	0	0		6	G. sessiflora	0		6	G. sessiflora	0	0
8	D. australe	0		8	D. australe	0	0		7	G. sessiflora	0		7	G. sessiflora	0	0		7	G. sessiflora	0		7	G. sessiflora	0	0
9	D. australe	0		9	D. australe	0	0		8	G. sessiflora	4		8	G. sessiflora	4	100		8	G. sessiflora	5		8	G. sessiflora	5	125
10	D. australe	2		10	D. australe	2	50		9	G. sessiflora	0		9	G. sessiflora	0	0		9	G. sessiflora	2		9	G. sessiflora	2	50
1	G. sessiflora	1		1	G. sessiflora	1	25		10	G. sessiflora	1		10	G. sessiflora	1	25		10	G. sessiflora	1		10	G. sessiflora	1	25
2	G. sessiflora	8		2	G. sessiflora	8	200		1	H. chathamica	1		1	H. chathamica	1	25		1	H. chathamica	1		1	H. chathamica	1	25
3	G. sessiflora	3		3	G. sessiflora	3	75		2	H. chathamica	5		2	H. chathamica	5	125		2	H. chathamica	5		2	H. chathamica	5	125
4	G. sessiflora	4		4	G. sessiflora	4	100		3	H. chathamica	0		3	H. chathamica	0	0		3	H. chathamica	2		3	H. chathamica	2	50
5	G. sessiflora	2		5	G. sessiflora	2	50		4	H. chathamica	6		4	H. chathamica	6	150		4	H. chathamica	5		4	H. chathamica	5	125
6	G. sessiflora	2		6	G. sessiflora	2	50		5	H. chathamica	3		5	H. chathamica	3	75		5	H. chathamica	5		5	H. chathamica	5	125
7	G. sessiflora	0		7	G. sessiflora	0	0		6	H. chathamica	1		6	H. chathamica	1	25		6	H. chathamica	1		6	H. chathamica	1	25
8	G. sessiflora	3		8	G. sessiflora	3	75		7	H. chathamica	0		7	H. chathamica	0	0		7	H. chathamica	1		7	H. chathamica	1	25
9	G. sessiflora	1		9	G. sessiflora	1	25		8	H. chathamica	1		8	H. chathamica	1	25		8	H. chathamica	1		8	H. chathamica	1	25
10	G. sessiflora	0		10	G. sessiflora	0	0		9	H. chathamica	0		9	H. chathamica	0	0		9	H. chathamica	5		9	H. chathamica	5	125
1	H. chathamica	2		1	H. chathamica	2	50		10	H. chathamica	1		10	H. chathamica	1	25		10	H. chathamica	2		10	H. chathamica	2	50
2	H. chathamica	2		2	H. chathamica	2	50		1	L. squalida	0		1	L. squalida	0	0		1	L. squalida	0
3	H. chathamica	1		3	H. chathamica	1	25		2	L. squalida	1		2	L. squalida	1	25		2	L. squalida	0
4	H. chathamica	1		4	H. chathamica	1	25		3	L. squalida	0		3	L. squalida	0	0		3	L. squalida	0
5	H. chathamica	0		5	H. chathamica	0	0		4	L. squalida	2		4	L. squalida	2	50		4	L. squalida	0
6	H. chathamica	1		6	H. chathamica	1	25		5	L. squalida	0		5	L. squalida	0	0		5	L. squalida	0
7	H. chathamica	2		7	H. chathamica	2	50		6	L. squalida	0		6	L. squalida	0	0		6	L. squalida	0
8	H. chathamica	3		8	H. chathamica	3	75		7	L. squalida	0		7	L. squalida	0	0		7	L. squalida	0
9	H. chathamica	2		9	H. chathamica	2	50		8	L. squalida	1		8	L. squalida	1	25		8	L. squalida	0
10	H. chathamica	1		10	H. chathamica	1	25		9	L. squalida	0		9	L. squalida	0	0		9	L. squalida	0
1	L. squalida	0							10	L. squalida	0		10	L. squalida	0	0		10	L. squalida	0
2	L. squalida	0							1	L. dioica	0							1	L. dioica	1		1	L. dioica	1	25
3	L. squalida	0							2	L. dioica	0							2	L. dioica	0		2	L. dioica	0	0
4	L. squalida	0							3	L. dioica	0							3	L. dioica	0		3	L. dioica	0	0
5	L. squalida	0							4	L. dioica	0							4	L. dioica	0		4	L. dioica	0	0
6	L. squalida	0							5	L. dioica	0							5	L. dioica	0		5	L. dioica	0	0
7	L. squalida	0							6	L. dioica	0							6	L. dioica	1		6	L. dioica	1	25
8	L. squalida	0							7	L. dioica	0							7	L. dioica	0		7	L. dioica	0	0
9	L. squalida	0							8	L. dioica	0							8	L. dioica	0		8	L. dioica	0	0
10	L. squalida	1							9	L. dioica	0							9	L. dioica	0		9	L. dioica	0	0
1	L. dioica	0		1	L. dioica	0	0		10	L. dioica	0							10	L. dioica	0		10	L. dioica	0	0
2	L. dioica	0		2	L. dioica	0	0		1	M. axillaris	0		1	M. axillaris	0	0		1	M. axillaris	3		1	M. axillaris	3	75
3	L. dioica	1		3	L. dioica	1	25		2	M. axillaris	0		2	M. axillaris	0	0		2	M. axillaris	0		2	M. axillaris	0	0
4	L. dioica	1		4	L. dioica	1	25		3	M. axillaris	1		3	M. axillaris	1	25		3	M. axillaris	1		3	M. axillaris	1	25
5	L. dioica	0		5	L. dioica	0	0		4	M. axillaris	1		4	M. axillaris	1	25		4	M. axillaris	2		4	M. axillaris	2	50
6	L. dioica	0		6	L. dioica	0	0		5	M. axillaris	0		5	M. axillaris	0	0		5	M. axillaris	0		5	M. axillaris	0	0
7	L. dioica	0		7	L. dioica	0	0		6	M. axillaris	1		6	M. axillaris	1	25		6	M. axillaris	1		6	M. axillaris	1	25
8	L. dioica	0		8	L. dioica	0	0		7	M. axillaris	0		7	M. axillaris	0	0		7	M. axillaris	1		7	M. axillaris	1	25
9	L. dioica	0		9	L. dioica	0	0		8	M. axillaris	0		8	M. axillaris	0	0		8	M. axillaris	0		8	M. axillaris	0	0
10	L. dioica	1		10	L. dioica	1	25		9	M. axillaris	0		9	M. axillaris	0	0		9	M. axillaris	4		9	M. axillaris	4	100
1	M. axillaris	0		1	M. axillaris	0	0		10	M. axillaris	0		10	M. axillaris	0	0		10	M. axillaris	0		10	M. axillaris	0	0
2	M. axillaris	2		2	M. axillaris	2	50		1	P. angulata	0		1	P. angulata	0	0		1	P. angulata	0		1	P. angulata	0	0
3	M. axillaris	4		3	M. axillaris	4	100		2	P. angulata	0		2	P. angulata	0	0		2	P. angulata	0		2	P. angulata	0	0
4	M. axillaris	0		4	M. axillaris	0	0		3	P. angulata	0		3	P. angulata	0	0		3	P. angulata	0		3	P. angulata	0	0
5	M. axillaris	0		5	M. axillaris	0	0		4	P. angulata	6		4	P. angulata	6	150		4	P. angulata	0		4	P. angulata	0	0
6	M. axillaris	1		6	M. axillaris	1	25		5	P. angulata	3		5	P. angulata	3	75		5	P. angulata	1		5	P. angulata	1	25
7	M. axillaris	1		7	M. axillaris	1	25		6	P. angulata	0		6	P. angulata	0	0		6	P. angulata	0		6	P. angulata	0	0
8	M. axillaris	0		8	M. axillaris	0	0		7	P. angulata	3		7	P. angulata	3	75		7	P. angulata	1		7	P. angulata	1	25
9	M. axillaris	0		9	M. axillaris	0	0		8	P. angulata	0		8	P. angulata	0	0		8	P. angulata	0		8	P. angulata	0	0
10	M. axillaris	0		10	M. axillaris	0	0		9	P. angulata	0		9	P. angulata	0	0		9	P. angulata	3		9	P. angulata	3	75
1	M. ephedroides	0							10	P. angulata	1		10	P. angulata	1	25		10	P. angulata	3		10	P. angulata	3	75
2	M. ephedroides	0							1	R. hookerii	0		1	R. hookerii	0	0		1	R. hookerii	0		1	R. hookerii	0	0
3	M. ephedroides	0							2	R. hookerii	0		2	R. hookerii	0	0		2	R. hookerii	2		2	R. hookerii	2	50
4	M. ephedroides	0							3	R. hookerii	0		3	R. hookerii	0	0		3	R. hookerii	0		3	R. hookerii	0	0
5	M. ephedroides	0							4	R. hookerii	0		4	R. hookerii	0	0		4	R. hookerii	0		4	R. hookerii	0	0
6	M. ephedroides	0							5	R. hookerii	3		5	R. hookerii	3	75		5	R. hookerii	0		5	R. hookerii	0	0
7	M. ephedroides	0							6	R. hookerii	0		6	R. hookerii	0	0		6	R. hookerii	1		6	R. hookerii	1	25
8	M. ephedroides	0							7	R. hookerii	0		7	R. hookerii	0	0		7	R. hookerii	1		7	R. hookerii	1	25
9	M. ephedroides	0							8	R. hookerii	0		8	R. hookerii	0	0		8	R. hookerii	1		8	R. hookerii	1	25
10	M. ephedroides	0							9	R. hookerii	0		9	R. hookerii	0	0		9	R. hookerii	0		9	R. hookerii	0	0
1	P. angulata	0							10	R. hookerii	0		10	R. hookerii	0	0		10	R. hookerii	0		10	R. hookerii	0	0
2	P. angulata	0							1	S. uniflorus	0							1	S. uniflorus	0
3	P. angulata	0							2	S. uniflorus	0							2	S. uniflorus	0
4	P. angulata	0							3	S. uniflorus	0							3	S. uniflorus	0
5	P. angulata	0							4	S. uniflorus	0							4	S. uniflorus	0
6	P. angulata	0							5	S. uniflorus	0							5	S. uniflorus	0
7	P. angulata	0							6	S. uniflorus	0							6	S. uniflorus	0
8	P. angulata	0							7	S. uniflorus	0							7	S. uniflorus	0
9	P. angulata	0							8	S. uniflorus	0							8	S. uniflorus	0
10	P. angulata	0							9	S. uniflorus	0							9	S. uniflorus	0
1	R. hookerii	0							10	S. uniflorus	1							10	S. uniflorus	0
2	R. hookerii	0
3	R. hookerii	0							Analysis of variance										Analysis of variance
4	R. hookerii	0
5	R. hookerii	0							Variate: Spider		2009-01-01								Variate: Araneae		2009-03-01
6	R. hookerii	0
7	R. hookerii	0							Source of variation	d.f.	s.s.	m.s.	v.r.	F pr.					Source of variation	d.f.	s.s.	m.s.	v.r.	F pr.
8	R. hookerii	0							Block	9	24.01	2.668	1.61	0.126					Block	9	15.44	1.716	0.81	0.609
9	R. hookerii	0							Treatment	9	27.61	3.068	1.85	0.071					Treatment	9	103.04	11.449	5.4	<.001
10	R. hookerii	0							Residual	81	134.09	1.655							Residual	81	171.76	2.12
1	R. subsericea	0							Total	99	185.71								Total	99	290.24
2	R. subsericea	0
3	R. subsericea	0
4	R. subsericea	0							Message: the following units have large residuals.										Message: the following units have large residuals.
5	R. subsericea	0
6	R. subsericea	0							*units* 3	3.07	s.e. 1.16								*units* 12	3.74	s.e. 1.31
7	R. subsericea	0							*units* 19	2.97	s.e. 1.16								*units* 45	4.04	s.e. 1.31
8	R. subsericea	0							*units* 52	3.17	s.e. 1.16
9	R. subsericea	0							*units* 54	3.27	s.e. 1.16
10	R. subsericea	0							*units* 84	3.77	s.e. 1.16								Tables of means
1	S. uniflorus	0
2	S. uniflorus	1																	Variate: Araneae
3	S. uniflorus	0							Tables of means
4	S. uniflorus	0																	Grand mean 1.24
5	S. uniflorus	0							Variate: Spider
6	S. uniflorus	0																		Block	1	2	3	4	5	6	7
7	S. uniflorus	0							Grand mean 0.77												1.1	1.7	1.4	1.4	1.9	0.8	0.8
8	S. uniflorus	0
9	S. uniflorus	0								Block	1	2	3	4	5	6	7			Block	8	9	10
10	S. uniflorus	0									0.3	0.8	1.3	1.7	1.4	0.4	0.3				0.9	1.6	0.8
		72
										Block	8	9	10							Treatment	A. bellidioides	A. inermis	A. purpurea	G. sessiflora
Analysis of variance											0.7	0.4	0.4								0.9	0.7	1.8	3.3
Variate: Spiders		2008-08-01								Treatment	A. bellidioides	A. inermis	A. purpurea	G. sessiflora						Treatment	Grass	H. chathamica	L. dioica	M. axillaris
											0.7	0.6	0.4	1.5							0.2	2.8	0.2	1.2
Source of variation	d.f.	s.s.	m.s.	v.r.	F pr.
Rep	9	23.363	2.596	2.05	0.048					Treatment	Grass	H. chathamica	L. squalida	M. axillaris						Treatment	P. angulata	R. hookerii
Treatment	7	38.388	5.484	4.33	<.001						0.4	1.8	0.4	0.3							0.8	0.5
Residual	63	79.738	1.266
Total	79	141.487								Treatment	P. angulata	R. hookerii
											1.3	0.3							Least significant differences of means (5% level)
Message: the following units have large residuals.																			Table	Block	Treatment
									Least significant differences of means (5% level)										rep.	10	10
*units* 42	4.46	s.e. 1.00																	d.f.	81	81
*units* 73	2.44	s.e. 1.00							Table	Block	Treatment								l.s.d.	1.296	1.296
									rep.	10	10
									d.f.	81	81
Tables of means									l.s.d.	1.145	1.145
Variate: Spiders
Grand mean 0.86
	Rep	1	2	3	4	5	6	7
		0.38	2	1.62	1.12	0.38	0.75	0.38
	Rep	8	9	10
		0.88	0.38	0.75
	Treatment	A. bellidioides	A. inermis	A. purpurea	D. australe
		0.7	0.2	0.6	0.4
	Treatment	G. sessiflora	H. chathamica	L. dioica	M. axillaris
		2.4	1.5	0.3	0.8
Least significant differences of means (5% level)
Table	Rep	Treatment
rep.	8	10
d.f.	63	63
l.s.d.	1.124	1.005
Analysis of variance
Variate: Spiders_m2			2008-08-01
Source of variation	d.f.	s.s.	m.s.	v.r.	F pr.
Rep	9	14601.6	1622.4	2.05	0.048
Treatment	7	23992.2	3427.5	4.33	<.001
Residual	63	49835.9	791
Total	79	88429.7
Message: the following units have large residuals.
*units* 42	111.6	s.e. 25.0
*units* 73	60.9	s.e. 25.0
Tables of means
Variate: Spiders_m2
Grand mean 21.6
	Rep	1	2	3	4	5	6	7
		9.4	50	40.6	28.1	9.4	18.8	9.4
	Rep	8	9	10
		21.9	9.4	18.8
	Treatment	A. bellidioides	A. inermis	A. purpurea	D. australe
		17.5	5	15	10
	Treatment	G. sessiflora	H. chathamica	L. dioica	M. axillaris
		60	37.5	7.5	20
Least significant differences of means (5% level)
Table	Rep	Treatment
rep.	8	10
d.f.	63	63
l.s.d.	28.1	25.14

## Sheet: SMoist & microbe Dec08, Table 5
Sample	Absorbance	Corrected	Corrected	Calculated conc	Soil	Dry wt 1g	DH activity	DH activity		Go right for Dave's copy								Dave's workings											Soil	Sample		Dry wt 1g		Soil moist%	Soil moist%		Analysis of variance
number	reading (ave)	for dilution	for blank	(ug TPF/mL)	weight (g)	moist soil	(ug/dwt g)	(ug/dwt g/hr)			Your equation										Omitted the trt with only 2 reps								moisture%	number		moist soil	Water wt	(dry wt basis)	(fresh wt basis)
Blank ave	0.0145	see note												Abs = 0.02412*conc + .01826					DH activity	(I assume)	Unsure if from blocks 1-5, so blocking omitted.								2008-12-01	Sample	Treat!	dwt	waterwt	Moistdwt	Moistfwt		Variate: Moistdwt		2008-12-01
P1	0.5516	0.5516	0.5371	21.5108	4.69179	0.940239	219.428	9.14282			So							Trt!	(ug/dwt g/hr)										Dave S	P1	P	0.940239	0.059761	6.35593	5.9761
P2	0.6433	0.6433	0.6288	25.3126	4.61148	0.920455	268.353	11.1814			Conc =	(abs	-0.01826					Leptinella	27.3144			Analysis of variance								P2	P	0.920455	0.0795455	8.64198	7.95455		Source of variation	d.f.	s.s.	m.s.	v.r.	F pr.
P3	0.8234	0.8234	0.8089	32.7794	4.70149	0.940299	333.666	13.9028				0.02412						Leptinella	23.5476											P3	P	0.940299	0.0597015	6.34921	5.97015		Treat	6	31.686	5.281	1.3	0.291
P4	0.7595	0.7595	0.745	30.1302	4.60229	0.909543	323.905	13.496										Leptinella	21.2004			Variate: %_ug_dwt_g_hr								P4	P	0.909543	0.0904573	9.94536	9.04573		Residual	28	114.11	4.075
P5	0.8216	0.8216	0.8071	32.7048	4.80161	0.962246	318.531	13.2721										Leptinella	15.2541											P5	P	0.962246	0.0377541	3.92354	3.77541		Total	34	145.796
C1	0.6284	0.6284	0.6139	24.6949	4.75333	0.958333	243.952	10.1647										Leptinella	12.4727			Source of variation	d.f.	s.s.	m.s.	v.r.	F pr.			C1	C	0.958333	0.0416667	4.34783	4.16667
C2	0.5619	0.5619	0.5474	21.9378	4.50553	0.927063	236.347	9.84781										Pratia	9.14282			Trt	6	454.16	75.69	6.5	<.001			C2	C	0.927063	0.0729367	7.86749	7.29367
C3	0.2002	0.2002	0.1857	6.94196	4.74184	0.954092	69.049	2.87704		I can't remember which samples we diluted								Pratia	11.1814			Residual	28	326.1	11.65					C3	C	0.954092	0.0459082	4.81172	4.59082		Message: the following units have large residuals.
C4	0.3663	0.3663	0.3518	13.8284	4.83682	0.963511	133.526	5.56359		just 1 plant type I think, so if dilution was								Pratia	13.9028			Total	34	780.26						C4	C	0.963511	0.0364892	3.7871	3.64892
C5	0.3226	0.3226	0.3081	12.0166	4.72386	0.948566	120.678	5.02826		x2 then multiply reading by this to get								Pratia	13.496											C5	C	0.948566	0.0514342	5.42231	5.14342		*units* 11	6.78	s.e. 1.81
Pur 1	0.586	0.586	0.5715	22.937	4.33221	0.87343	272.779	11.3658		absorbance for original sample - I haven't								Pratia	13.2721											Pur 1	Pur	0.87343	0.12657	14.4912	12.657
Pur 2	0.7001	0.7001	0.6856	27.6675	4.6765	0.940945	282.942	11.7893		calculated this here!								Purpurea	11.3658			Message: the following units have large residuals.								Pur 2	Pur	0.940945	0.0590551	6.27615	5.90551
Pur 3	0.9964	0.9964	0.9819	39.9519	4.7505	0.9501	398.329	16.597		(if no dilution then number is just original reading)								Purpurea	11.7893											Pur 3	Pur	0.9501	0.0499002	5.2521	4.99002		Tables of means
Pur 4	0.639	0.639	0.6245	25.1343	4.64475	0.930812	261.611	10.9004										Purpurea	16.597			*units* 1	7.36	s.e. 3.05						Pur 4	Pur	0.930812	0.0691882	7.4331	6.91882
Pur 5	0.9545	0.9545	0.94	38.2148	4.8058	0.951644	376.013	15.6672										Purpurea	10.9004			*units* 5	-7.49	s.e. 3.05						Pur 5	Pur	0.951644	0.0483559	5.0813	4.83559		Variate: Moistdwt
Lep 1	1.5784	1.5784	1.5639	64.0813	4.68981	0.937963	655.544	27.3144		Equation in column H from DHA method								Purpurea	15.6672											Lep 1	Lep	0.937963	0.062037	6.61402	6.2037
Lep 2	1.409	1.409	1.3945	57.058	4.77571	0.951336	565.142	23.5476										Hebe	15.3766											Lep 2	Lep	0.951336	0.0486641	5.11535	4.86641		Grand mean 6.16
Lep 3	1.2328	1.2328	1.2183	49.7529	4.68585	0.939048	508.809	21.2004										Hebe	15.9771			Tables of means								Lep 3	Lep	0.939048	0.0609524	6.49087	6.09524
Lep 4	0.8727	0.8727	0.8582	34.8234	4.64471	0.921569	366.098	15.2541										Hebe	10.4059											Lep 4	Lep	0.921569	0.0784314	8.51064	7.84314			Treat	C	Ger	Hebe	Lep	M	P	Pur
Lep 5	0.7508	0.7508	0.7363	29.7695	4.7256	0.947013	299.344	12.4727										Hebe	9.04816			Variate: %_ug_dwt_g_hr								Lep 5	Lep	0.947013	0.0529865	5.59512	5.29865				5.25	5.2	5.04	6.47	6.43	7.04	7.71
Hebe 1	0.9473	0.9473	0.9328	37.9163	4.80804	0.961609	369.038	15.3766										Hebe	13.8181											Hebe 1	Hebe	0.961609	0.0383912	3.9924	3.83912
Hebe 2	0.9793	0.9793	0.9648	39.243	4.80823	0.957814	383.449	15.9771												Anaphalioides	11.0682	Grand mean 12.69								Hebe 2	Hebe	0.957814	0.042186	4.4044	4.2186
Hebe 3	0.6348	0.6348	0.6203	24.9602	4.74683	0.947471	249.742	10.4059												Anaphalioides	11.098									Hebe 3	Hebe	0.947471	0.0525292	5.54415	5.25292		Least significant differences of means (5% level)
Hebe 4	0.5537	0.5537	0.5392	21.5978	4.73054	0.946108	217.156	9.04816										Muelenbeckia	16.7032				Trt	Leptinella	Pratia	Purpurea	Hebe	Muelenbeckia		Hebe 4	Hebe	0.946108	0.0538922	5.6962	5.38922
Hebe 5	0.827	0.827	0.8125	32.9287	4.71714	0.947217	331.634	13.8181										Muelenbeckia	9.95156					19.96	12.2	13.26	12.93	11.6		Hebe 5	Hebe	0.947217	0.0527831	5.57244	5.27831		Table	Treat
Ana 1	0.7114	0.7114	0.6969	28.136	4.90613	0.97151	265.637	11.0682										Muelenbeckia	13.0939																		rep.	5
Ana 2	0.6776	0.6776	0.6631	26.7347	4.75702	0.949505	266.351	11.098										Muelenbeckia	8.373				Trt	Geranium	Control												d.f.	28
M1	0.988	0.988	0.9735	39.6036	4.73821	0.93826	400.876	16.7032										Muelenbeckia	9.87902					12.17	6.7					M1	M	0.93826	0.0617399	6.58026	6.17399		l.s.d.	2.615
M2	0.6044	0.6044	0.5899	23.6998	4.72512	0.945024	238.837	9.95156										Geranium	14.9981											M2	M	0.945024	0.0549763	5.81745	5.49763
M3	0.7896	0.7896	0.7751	31.3781	4.75405	0.94514	314.253	13.0939										Geranium	12.3168											M3	M	0.94514	0.0548604	5.80448	5.48604
M4	0.4951	0.4951	0.4806	19.1683	4.61417	0.930275	200.952	8.373										Geranium	10.1506			Least significant differences of means (5% level)								M4	M	0.930275	0.0697248	7.49507	6.97248
M5	0.5936	0.5936	0.5791	23.2521	4.69742	0.939484	237.097	9.87902										Geranium	11.6871											M5	M	0.939484	0.0605159	6.44139	6.05159
Ger 1	0.8769	0.8769	0.8624	34.9975	4.70054	0.930799	359.953	14.9981										Geranium	11.6921			Table	Trt							Ger 1	Ger	0.930799	0.0692008	7.43455	6.92008
Ger 2	0.7833	0.7833	0.7688	31.1169	4.89098	0.968511	295.603	12.3168										Control	10.1647			rep.	5							Ger 2	Ger	0.968511	0.0314885	3.25123	3.14885
Ger 3	0.619	0.619	0.6045	24.3051	4.76157	0.942885	243.614	10.1506										Control	9.84781			d.f.	28							Ger 3	Ger	0.942885	0.0571152	6.05749	5.71152
Ger 4	0.7228	0.7228	0.7083	28.6086	4.80008	0.95619	280.49	11.6871										Control	2.87704			l.s.d.	4.421							Ger 4	Ger	0.95619	0.0438095	4.58167	4.38095
Ger 5	0.7217	0.7217	0.7072	28.563	4.79522	0.955224	280.61	11.6921										Control	5.56359											Ger 5	Ger	0.955224	0.0447761	4.6875	4.47761
																		Control	5.02826
Blank A	0.0146	Blank ave																												OMITTED
Blank B	0.0144	0.0145																												Ana 1		0.97151	0.02849	2.93255	2.849
																														Ana 2		0.949505	0.050495	5.31804	5.0495

## Sheet: Soil moisture Sep09, Table 5
Soil Moisture September 09			In oven at 107degrees for 24hrs
Samples taken by: 3 approx 30g samples taken from under plant and bulked from each rep								DJS	DJS
SEE below!!								Freshwt basis	Drywt basis
rep	Treatment	Tin	Tin & wet	Tin & dry	wet	dry	moisture	soil moist%	soil moist%
1	Anaphalioides	10.85	43.38	38.98	32.53	28.13	4.4	13.526	15.6417
2	Anaphalioides	10.86	42.68	38.4	31.82	27.54	4.28	13.4507	15.541	13.4883
1	Hebe	7.39	38.66	35.22	31.27	27.83	3.44	11.001	12.3608
2	Hebe	10.81	41.65	36.35	30.84	25.54	5.3	17.1855	20.7518
3	Hebe	7.07	38.77	34.2	31.7	27.13	4.57	14.4164	16.8448
4	Hebe	7.01	38.08	34.16	31.07	27.15	3.92	12.6167	14.4383
5	Hebe	10.87	42.34	37.76	31.47	26.89	4.58	14.5535	17.0324	13.9546
1	Control	7.01	37.09	34.39	30.08	27.38	2.7	8.97606	9.86121
2	Control	10.86	30.15	28.46	19.29	17.6	1.69	8.76102	9.60227
3	Control	7	27.22	25.44	20.22	18.44	1.78	8.80317	9.65293
4	Control	10.85	40.89	37.66	30.04	26.81	3.23	10.7523	12.0477
5	Control	7.38	28.03	26.07	20.65	18.69	1.96	9.49153	10.4869	9.35682
1	Purpurea	10.84	41.57	37.59	30.73	26.75	3.98	12.9515	14.8785
2	Purpurea	10.87	42.78	38.59	31.91	27.72	4.19	13.1307	15.1154
3	Purpurea	6.96	39.09	35.4	32.13	28.44	3.69	11.4846	12.9747
4	Purpurea	11.1	42.27	38.46	31.17	27.36	3.81	12.2233	13.9254
5	Purpurea	6.94	41.44	36.37	34.5	29.43	5.07	14.6957	17.2273	12.8971
1	Leptinella dioica	7.29	39.24	35.4	31.95	28.11	3.84	12.0188	13.6606
2	Leptinella dioica	10.82	44.23	41.07	33.41	30.25	3.16	9.45825	10.4463
3	Leptinella dioica	10.88	42.82	35.14	31.94	24.26	7.68	24.0451	31.657
4	Leptinella dioica	7.3	39.54	35.61	32.24	28.31	3.93	12.1898	13.882
5	Leptinella dioica	7.05	39.92	37.33	32.87	30.28	2.59	7.87953	8.5535	13.1183
1	Pratia	7.47	38.81	35.78	31.34	28.31	3.03	9.66816	10.7029
2	Pratia	10.87	41.21	38.07	30.34	27.2	3.14	10.3494	11.5441	10.0088
1	Geranium	7.3	38.46	34.41	31.16	27.11	4.05	12.9974	14.9391
2	Geranium	7.34	37.87	33.21	30.53	25.87	4.66	15.2637	18.0131
3	Geranium	10.99	41.48	35.91	30.49	24.92	5.57	18.2683	22.3515
4	Geranium	10.96	44.17	40.34	33.21	29.38	3.83	11.5327	13.0361
5	Geranium	7.04	38.46	33.9	31.42	26.86	4.56	14.513	16.9769	14.515
1	M. axillaris	10.98	44.05	39.27	33.07	28.29	4.78	14.4542	16.8964
2	M. axillaris	6.99	40	33.43	33.01	26.44	6.57	19.9031	24.8487
3	M. axillaris	7.07	38.76	34.36	31.69	27.29	4.4	13.8845	16.1231
4	M. axillaris	10.94	40.46	30.75	29.52	19.81	9.71	32.893	49.0156
5	M. axillaris	10.85	46.11	42.17	35.26	31.32	3.94	11.1741	12.5798	18.4618
Planting sites Sept 09		Three 100g samples taken across sites and bulked. Then approx 30g used to measure % water content.
	Weka sept	6.97	39.73	35.11	32.76	28.14	4.62	14.1026
	Terrace sept	10.82	54.86	54.21	44.04	43.39	0.65	1.47593
	Vicarage	6.95	40.27	33.89	33.32	26.94	6.38	19.1477
	Mudhouse	7.32	37.57	30.63	30.25	23.31	6.94	22.9421
	Mound	10.92	49.67	44.82	38.75	33.9	4.85	12.5161
	Waiata	10.92	44.13	35.71	33.21	24.79	8.42	25.3538
	Cabal	6.57	40.43	35.01	33.86	28.44	5.42	16.0071
	Julian Ball	6.37	39.53	34.81	33.16	28.44	4.72	14.234
Dave's copy, Sep 09 soil moist DWT!!
rep	Treatment!	wet	dry	moisture	smFWT	smDWT
1	Hebe	31.27	27.83	3.44	11.001	12.3608
2	Hebe	30.84	25.54	5.3	17.1855	20.7518
3	Hebe	31.7	27.13	4.57	14.4164	16.8448
4	Hebe	31.07	27.15	3.92	12.6167	14.4383
5	Hebe	31.47	26.89	4.58	14.5535	17.0324
1	Control	30.08	27.38	2.7	8.97606	9.86121
2	Control	19.29	17.6	1.69	8.76102	9.60227
3	Control	20.22	18.44	1.78	8.80317	9.65293
4	Control	30.04	26.81	3.23	10.7523	12.0477
5	Control	20.65	18.69	1.96	9.49153	10.4869
1	Purpurea	30.73	26.75	3.98	12.9515	14.8785
2	Purpurea	31.91	27.72	4.19	13.1307	15.1154
3	Purpurea	32.13	28.44	3.69	11.4846	12.9747
4	Purpurea	31.17	27.36	3.81	12.2233	13.9254
5	Purpurea	34.5	29.43	5.07	14.6957	17.2273
1	Leptinella dioica	31.95	28.11	3.84	12.0188	13.6606
2	Leptinella dioica	33.41	30.25	3.16	9.45825	10.4463
3	Leptinella dioica	31.94	24.26	7.68	24.0451	*	31.657
4	Leptinella dioica	32.24	28.31	3.93	12.1898	13.882
5	Leptinella dioica	32.87	30.28	2.59	7.87953	8.5535
1	Geranium	31.16	27.11	4.05	12.9974	14.9391
2	Geranium	30.53	25.87	4.66	15.2637	18.0131
3	Geranium	30.49	24.92	5.57	18.2683	22.3515
4	Geranium	33.21	29.38	3.83	11.5327	13.0361
5	Geranium	31.42	26.86	4.56	14.513	16.9769
1	M. axillaris	33.07	28.29	4.78	14.4542	16.8964
2	M. axillaris	33.01	26.44	6.57	19.9031	24.8487
3	M. axillaris	31.69	27.29	4.4	13.8845	16.1231
4	M. axillaris	29.52	19.81	9.71	32.893	*	49.0156	Made *
5	M. axillaris	35.26	31.32	3.94	11.1741	12.5798
Pratia omitted since only 2 reps
Two weirdo sm's made "missing"
Analysis of variance
Variate: smDWT		2009-09-01
Source of variation	d.f.	(m.v.)	s.s.	m.s.	v.r.	F pr.
Treatment	5		225.235	45.047	4.86	0.004
Residual	22	-2	203.996	9.273
Total	27	-2	411.372
Message: the following units have large residuals.
*units* 23	5.29	s.e. 2.61
*units* 27	7.24	s.e. 2.61
Tables of means
Variate: smDWT
Grand mean 14.63
	Treatment	Control	Geranium	Hebe
		10.33	17.06	16.29
	Treatment	Leptinella dioica	M. axillaris	Purpurea
		11.64	17.61	14.82
Least significant differences of means (5% level)
Table	Treatment
rep.	5
d.f.	22
l.s.d.	3.994
(Not adjusted for missing values)

## Sheet: Soilmoist Nov 09, Table 5
Soil moisture November 8th 09
In oven at 107degrees for 24hrs
Samples taken by: 3 approx 30g samples taken from under plant and bulked from each rep											Dave's GenStat below
								Jean - fresh wt			Dave - dry wt
rep	Treatment	Tin	Tin & wet	Tin & dry	wet	dry	moisture	%			Moisture%
1	Anaphalioides	10.93	52.57	47.87	41.64	36.94	4.7	11.2872			12.7233
2	Anaphalioides	10.82	60.89	55.58	50.07	44.76	5.31	10.6052	10.9462		11.8633
1	Hebe	7.08	63.96	59.51	56.88	52.43	4.45	7.82349			8.48751
2	Hebe	10.81	84.27	80.11	73.46	69.3	4.16	5.66295			6.00289
3	Hebe	7.06	54.83	51.08	47.77	44.02	3.75	7.85012			8.51886
4	Hebe	10.82	55.74	51.03	44.92	40.21	4.71	10.4853			11.7135
5	Hebe	6.93	37.36	35.37	30.43	28.44	1.99	6.5396	7.67229		6.99719
1	Control	36.66	68.82	66.11	32.16	29.45	2.71	8.42662			9.20204
2	Control	36.84	68.99	66.26	32.15	29.42	2.73	8.49145			9.2794
3	Control	56.89	88.29	86.02	31.4	29.13	2.27	7.2293			7.79265
4	Control	56.91	87.93	86.35	31.02	29.44	1.58	5.09349			5.36685
5	Control	59.14	96.62	95.19	37.48	36.05	1.43	3.81537	6.61124		3.96671
1	Purpurea	57.14	88.9	83.14	31.76	26	5.76	18.136			22.1538
2	Purpurea	56.55	94.05	89.89	37.5	33.34	4.16	11.0933			12.4775
3	Purpurea	56.74	95.71	91.78	38.97	35.04	3.93	10.0847			11.2158
4	Purpurea	56.54	92.97	89.94	36.43	33.4	3.03	8.31732			9.07186
5	Purpurea	7.08	40.09	35.35	33.01	28.27	4.74	14.3593	12.3981		16.7669
1	Leptinella dioica	56.58	93.54	90.97	36.96	34.39	2.57	6.95346			7.4731
2	Leptinella dioica	56.78	91.05	88.37	34.27	31.59	2.68	7.82025			8.4837
3	Leptinella dioica	56.81	88.97	86.11	32.16	29.3	2.86	8.89303			9.76109
4	Leptinella dioica	56.8	95.03	93.23	38.23	36.43	1.8	4.70834			4.94098
5	Leptinella dioica	56.41	88.14	85.01	31.73	28.6	3.13	9.86448	7.64791		10.9441
1	Pratia	12.94	26.76	24.74	13.82	11.8	2.02	14.6165			17.1186
2	Pratia	13.22	29.06	26.55	15.84	13.33	2.51	15.846			18.8297
3	Pratia	13.02	28.63	25.97	15.61	12.95	2.66	17.0404			20.5405
4	Pratia	12.65	32.16	30.53	19.51	17.88	1.63	8.35469			9.11633
5	Pratia	12.82	27.7	25.7	14.88	12.88	2	13.4409	13.8597		15.528
1	Geranium	10.83	53.47	50.56	42.64	39.73	2.91	6.82458			7.32444
2	Geranium	10.87	46.87	44.2	36	33.33	2.67	7.41667			8.0108
3	Geranium	7.37	35.12	32	27.75	24.63	3.12	11.2432			12.6675
4	Geranium	11	63.31	60.41	52.31	49.41	2.9	5.54387			5.86926
5	Geranium	7.08	43.31	40.07	36.23	32.99	3.24	8.94287	7.99425		9.82116
1	M. axillaris	10.75	72.26	71.71	61.51	60.96	0.55	0.894164			0.902231
2	M. axillaris	6.92	43.82	40.91	36.9	33.99	2.91	7.88618			8.56134
3	M. axillaris	10.87	55.55	50.02	44.68	39.15	5.53	12.3769			14.1252
4	M. axillaris	6.94	45.02	40.45	38.08	33.51	4.57	12.0011			13.6377
5	M. axillaris	10.81	81.23	76.5	70.42	65.69	4.73	6.71684	7.97503		7.20049
1	Hook	11.03	79.67	75	68.64	63.97	4.67	6.80361			7.3003
2	Hook	7.01	37.27	34.58	30.26	27.57	2.69	8.88962			9.75698
3	Hook	6.96	45.08	43.12	38.12	36.16	1.96	5.14166			5.42035
4	Hook	7	55.53	51.73	48.53	44.73	3.8	7.83021			8.49542
5	Hook	9.92	43.79	41.09	33.87	31.17	2.7	7.97166	7.32735		8.66218
Data for GenStat, Dave
Blocks 1-5, I assume!								Fresh wt
rep!	Treatment!							soilmoisture%	Moisture%DWT		Analysis of variance
											Variate: Moisture%DWT			2009-11-01
1	Hebe							7.82349	8.48751
2	Hebe							5.66295	6.00289		Source of variation	d.f.	s.s.	m.s.	v.r.	F pr.
3	Hebe							7.85012	8.51886		rep	4	44.48	11.12	0.77	0.556
4	Hebe							10.4853	11.7135		Treatment	6	368.54	61.42	4.25	0.005
5	Hebe							6.5396	6.99719		Residual	24	347.05	14.46
1	Control							8.42662	9.20204		Total	34	760.07
2	Control							8.49145	9.2794
3	Control							7.2293	7.79265
4	Control							5.09349	5.36685		Message: the following units have large residuals.
5	Control							3.81537	3.96671
1	Purpurea							18.136	22.1538		*units* 11	7.72	s.e. 3.15
2	Purpurea							11.0933	12.4775		*units* 31	-8.08	s.e. 3.15
3	Purpurea							10.0847	11.2158		*units* 34	6.5	s.e. 3.15
4	Purpurea							8.31732	9.07186
5	Purpurea							14.3593	16.7669
1	Leptinella dioica							6.95346	7.4731		Tables of means
2	Leptinella dioica							7.82025	8.4837
3	Leptinella dioica							8.89303	9.76109		Variate: Moisture%DWT
4	Leptinella dioica							4.70834	4.94098
5	Leptinella dioica							9.86448	10.9441		Grand mean 10.28
1	Pratia							14.6165	17.1186
2	Pratia							15.846	18.8297			rep	1	2	3	4	5
3	Pratia							17.0404	20.5405				10.38	10.24	12.09	8.53	10.17
4	Pratia							8.35469	9.11633
5	Pratia							13.4409	15.528			Treatment	Control	Geranium	Hebe
1	Geranium							6.82458	7.32444				7.12	8.74	8.34
2	Geranium							7.41667	8.0108
3	Geranium							11.2432	12.6675			Treatment	Leptinella dioica	M. axillaris	Pratia
4	Geranium							5.54387	5.86926				8.32	8.89	16.23
5	Geranium							8.94287	9.82116
1	M. axillaris							0.894164	0.902231			Treatment	Purpurea
2	M. axillaris							7.88618	8.56134				14.34
3	M. axillaris							12.3769	14.1252
4	M. axillaris							12.0011	13.6377
5	M. axillaris							6.71684	7.20049		Least significant differences of means (5% level)
Omitted from Table 3 (I don't know why)											Table	rep	Treatment
											rep.	7	5
1	Hook							6.80361	7.3003		d.f.	24	24
2	Hook							8.88962	9.75698		l.s.d.	4.195	4.964
3	Hook							5.14166	5.42035
4	Hook							7.83021	8.49542
5	Hook							7.97166	8.66218

[truncated: 5 more sheets: Table 6, Table 7, Table 8, Weeds, Figure 1, Leafrollers, Figure 2]
